# Supplementary material
Source: PubMed Central journal article supplement (PMC3864649)

## Supplemental materials

Table 1: Fst statistics between subgroups calculated with all pruned variants.

|      | GBR   | FIN   | PUR    | CEU   | MXL   | TSI   | PUR2   | YRI   | LWK   | ASW   |
|------|-------|-------|--------|-------|-------|-------|--------|-------|-------|-------|
| GBR  | 0.000 | 0.007 | 0.010  | 0.004 | 0.022 | 0.008 | 0.025  | 0.153 | 0.140 | 0.098 |
| FIN  | 0.007 | 0.000 | 0.014  | 0.010 | 0.026 | 0.015 | 0.029  | 0.159 | 0.145 | 0.104 |
| PUR  | 0.010 | 0.014 | 0.000  | 0.013 | 0.013 | 0.013 | -0.087 | 0.116 | 0.104 | 0.071 |
| CEU  | 0.004 | 0.010 | 0.013  | 0.000 | 0.024 | 0.004 | 0.027  | 0.150 | 0.140 | 0.099 |
| MXL  | 0.022 | 0.026 | 0.013  | 0.024 | 0.000 | 0.025 | 0.025  | 0.134 | 0.122 | 0.083 |
| TSI  | 0.008 | 0.015 | 0.013  | 0.004 | 0.025 | 0.000 | 0.026  | 0.145 | 0.135 | 0.095 |
| PUR2 | 0.025 | 0.029 | -0.087 | 0.027 | 0.025 | 0.026 | 0.000  | 0.099 | 0.087 | 0.057 |
| YRI  | 0.153 | 0.159 | 0.116  | 0.150 | 0.134 | 0.145 | 0.099  | 0.000 | 0.012 | 0.012 |
| LWK  | 0.140 | 0.145 | 0.104  | 0.140 | 0.122 | 0.135 | 0.087  | 0.012 | 0.000 | 0.011 |
| ASW  | 0.098 | 0.104 | 0.071  | 0.099 | 0.083 | 0.095 | 0.057  | 0.012 | 0.011 | 0.000 |

Table 2: Fst statistics calculated between every pair of subgroups based on all pruned CVs from chromosomes 1-22.

|      | GBR   | FIN   | PUR    | CEU   | MXL   | TSI   | PUR2   | YRI   | LWK   | ASW   |
|------|-------|-------|--------|-------|-------|-------|--------|-------|-------|-------|
| GBR  | 0.000 | 0.007 | 0.011  | 0.004 | 0.022 | 0.008 | 0.028  | 0.163 | 0.149 | 0.107 |
| FIN  | 0.007 | 0.000 | 0.015  | 0.010 | 0.026 | 0.017 | 0.032  | 0.168 | 0.154 | 0.113 |
| PUR  | 0.011 | 0.015 | 0.000  | 0.015 | 0.016 | 0.015 | -0.084 | 0.133 | 0.119 | 0.083 |
| CEU  | 0.004 | 0.010 | 0.015  | 0.000 | 0.024 | 0.004 | 0.031  | 0.159 | 0.150 | 0.107 |
| MXL  | 0.022 | 0.026 | 0.016  | 0.024 | 0.000 | 0.025 | 0.029  | 0.147 | 0.134 | 0.092 |
| TSI  | 0.008 | 0.017 | 0.015  | 0.004 | 0.025 | 0.000 | 0.031  | 0.155 | 0.145 | 0.104 |
| PUR2 | 0.028 | 0.032 | -0.084 | 0.031 | 0.029 | 0.031 | 0.000  | 0.113 | 0.100 | 0.067 |
| YRI  | 0.163 | 0.168 | 0.133  | 0.159 | 0.147 | 0.155 | 0.113  | 0.000 | 0.013 | 0.014 |
| LWK  | 0.149 | 0.154 | 0.119  | 0.150 | 0.134 | 0.145 | 0.100  | 0.013 | 0.000 | 0.012 |
| ASW  | 0.107 | 0.113 | 0.083  | 0.107 | 0.092 | 0.104 | 0.067  | 0.014 | 0.012 | 0.000 |

Table 3: Fst statistics calculated between every pair of subgroups based on all pruned RVs from chromosomes 1-22.

|      | GBR   | FIN   | PUR    | CEU   | MXL   | TSI   | PUR2   | YRI   | LWK   | ASW   |
|------|-------|-------|--------|-------|-------|-------|--------|-------|-------|-------|
| GBR  | 0.000 | 0.003 | 0.003  | 0.001 | 0.020 | 0.002 | 0.004  | 0.009 | 0.009 | 0.003 |
| FIN  | 0.003 | 0.000 | 0.005  | 0.003 | 0.021 | 0.004 | 0.006  | 0.011 | 0.011 | 0.005 |
| PUR  | 0.003 | 0.005 | 0.000  | 0.003 | 0.003 | 0.003 | -0.101 | 0.008 | 0.008 | 0.005 |
| CEU  | 0.001 | 0.003 | 0.003  | 0.000 | 0.020 | 0.001 | 0.004  | 0.008 | 0.009 | 0.003 |
| MXL  | 0.020 | 0.021 | 0.003  | 0.020 | 0.000 | 0.020 | 0.005  | 0.018 | 0.018 | 0.009 |
| TSI  | 0.002 | 0.004 | 0.003  | 0.001 | 0.020 | 0.000 | 0.003  | 0.008 | 0.008 | 0.003 |
| PUR2 | 0.004 | 0.006 | -0.101 | 0.004 | 0.005 | 0.003 | 0.000  | 0.008 | 0.008 | 0.004 |
| YRI  | 0.009 | 0.011 | 0.008  | 0.008 | 0.018 | 0.008 | 0.008  | 0.000 | 0.005 | 0.002 |
| LWK  | 0.009 | 0.011 | 0.008  | 0.009 | 0.018 | 0.008 | 0.008  | 0.005 | 0.000 | 0.004 |
| ASW  | 0.003 | 0.005 | 0.005  | 0.003 | 0.009 | 0.003 | 0.004  | 0.002 | 0.004 | 0.000 |

Table 4: Clustering results without AMR samples

|     |                    | w/o pruning |       |       |       | w/ pruning |       |       |       | 10000 pruned |       |       |       |
|-----|--------------------|-------------|-------|-------|-------|------------|-------|-------|-------|--------------|-------|-------|-------|
|     |                    | all         | CVs   | LFVs  | RVs   | all        | CV s  | LFVs  | RVs   | all          | CVs   | LFVs  | RVs   |
| SDR | best cluster #     | 10          | 12    | 19    | 8     | 9          | 17    | 14    | 10    | 10           | 27    | 19    | 10    |
|     | best RI            | 0.963       | 0.959 | 0.925 | 0.895 | 0.900      | 0.873 | 0.894 | 0.940 | 0.935        | 0.866 | 0.905 | 0.895 |
|     | best aRI           | 0.865       | 0.842 | 0.672 | 0.600 | 0.615      | 0.410 | 0.515 | 0.765 | 0.757        | 0.324 | 0.585 | 0.594 |
|     | RI at 10 clusters  | 0.929       | 0.950 | 0.912 | 0.895 | 0.848      | 0.821 | 0.837 | 0.940 | 0.809        | 0.812 | 0.848 | 0.870 |
|     | aRI at 10 clusters | 0.754       | 0.833 | 0.672 | 0.600 | 0.472      | 0.426 | 0.443 | 0.786 | 0.437        | 0.450 | 0.518 | 0.559 |
| PCA | best cluster #     | 9           | 11    | 12    | 12    | 10         | 10    | 10    | 18    | 9            | 12    | 18    | 12    |
|     | best RI            | 0.921       | 0.927 | 0.893 | 0.787 | 0.878      | 0.908 | 0.887 | 0.831 | 0.868        | 0.897 | 0.870 | 0.803 |
|     | best aRI           | 0.718       | 0.692 | 0.536 | 0.295 | 0.496      | 0.618 | 0.542 | 0.347 | 0.509        | 0.546 | 0.384 | 0.322 |
|     | RI at 10 clusters  | 0.884       | 0.894 | 0.699 | 0.707 | 0.819      | 0.790 | 0.790 | 0.738 | 0.699        | 0.837 | 0.721 | 0.784 |
|     | aRI at 10 clusters | 0.623       | 0.654 | 0.300 | 0.316 | 0.440      | 0.358 | 0.411 | 0.337 | 0.291        | 0.485 | 0.313 | 0.311 |

Table 5: Clustering result based on PCs of SDR with all pruned CVs.

|      | 1  | 2  | 3  | 4  | 5  | 6  | 7  | 8 | 9  | 10 | 11 | 12 | 13 | 14 | 15 | 16 | 17 |
|------|----|----|----|----|----|----|----|---|----|----|----|----|----|----|----|----|----|
| CEU  | 3  | 11 | 18 | 42 | 0  | 0  | 8  | 8 | 0  | 0  | 0  | 0  | 0  | 0  | 0  | 0  | 0  |
| FIN  | 0  | 0  | 0  | 0  | 0  | 36 | 0  | 0 | 0  | 0  | 0  | 0  | 0  | 0  | 0  | 0  | 0  |
| GBR  | 23 | 11 | 4  | 3  | 2  | 0  | 0  | 0 | 0  | 0  | 0  | 0  | 0  | 0  | 0  | 0  | 0  |
| TSI  | 0  | 0  | 2  | 24 | 0  | 0  | 48 | 0 | 18 | 0  | 0  | 0  | 0  | 0  | 0  | 0  | 0  |
| MXL  | 0  | 0  | 0  | 1  | 16 | 0  | 0  | 0 | 0  | 0  | 0  | 0  | 0  | 0  | 0  | 0  | 0  |
| PUR  | 0  | 0  | 0  | 0  | 5  | 0  | 0  | 0 | 0  | 0  | 0  | 0  | 0  | 0  | 0  | 0  | 0  |
| YRI  | 0  | 0  | 0  | 0  | 0  | 0  | 0  | 0 | 0  | 19 | 13 | 25 | 4  | 17 | 0  | 0  | 0  |
| LWK  | 0  | 0  | 0  | 0  | 0  | 0  | 0  | 0 | 0  | 0  | 10 | 0  | 10 | 0  | 22 | 25 | 0  |
| ASW  | 0  | 0  | 0  | 0  | 4  | 0  | 0  | 0 | 0  | 0  | 11 | 0  | 0  | 0  | 0  | 0  | 9  |
| PUR2 | 0  | 0  | 0  | 0  | 5  | 0  | 0  | 0 | 0  | 0  | 0  | 0  | 0  | 0  | 0  | 0  | 0  |

Table 6: Clustering result based on PCs of SDR with all pruned RVs.

|      | 1  | 2  | 3  | 4  | 5  | 6  | 7  |
|------|----|----|----|----|----|----|----|
| CEU  | 84 | 3  | 1  | 1  | 1  | 0  | 0  |
| FIN  | 1  | 0  | 35 | 0  | 0  | 0  | 0  |
| GBR  | 30 | 12 | 1  | 0  | 0  | 0  | 0  |
| TSI  | 1  | 0  | 0  | 0  | 91 | 0  | 0  |
| MXL  | 0  | 16 | 0  | 1  | 0  | 0  | 0  |
| PUR  | 0  | 0  | 0  | 5  | 0  | 0  | 0  |
| YRI  | 0  | 4  | 0  | 0  | 0  | 74 | 0  |
| LWK  | 0  | 5  | 0  | 3  | 0  | 0  | 59 |
| ASW  | 0  | 11 | 0  | 13 | 0  | 0  | 0  |
| PUR2 | 0  | 0  | 0  | 5  | 0  | 0  | 0  |

Table 7: Association testing results on CVs in simulation 2 with AMRs excluded

| Type      | I   | #PCs | w/o pruning |        |        |        | with pruning |        |        |        | 10000 pruned |        |        |        |
|-----------|-----|------|-------------|--------|--------|--------|--------------|--------|--------|--------|--------------|--------|--------|--------|
|           |     |      | all         | CVs    | LFVs   | RVs    | all          | CVs    | LFVs   | RVs    | all          | CVs    | LFVs   | RVs    |
| TypeI     | SDR | 0    | 0.637       | 0.637  | 0.637  | 0.637  | 0.637        | 0.637  | 0.637  | 0.637  | 0.637        | 0.637  | 0.637  | 0.637  |
|           |     | 2    | 0.074       | 0.074  | 0.074  | 0.080  | 0.074        | 0.074  | 0.074  | 0.079  | 0.074        | 0.074  | 0.074  | 0.097  |
|           |     | 10   | 0.077       | 0.065  | 0.077  | 0.074  | 0.080        | 0.072  | 0.079  | 0.073  | 0.077        | 0.077  | 0.072  | 0.092  |
|           |     | 15   | 0.061       | 0.066  | 0.076  | 0.075  | 0.080        | 0.062  | 0.063  | 0.078  | 0.081        | 0.078  | 0.075  | 0.091  |
|           |     | 20   | 0.069       | 0.067  | 0.065  | 0.076  | 0.064        | 0.066  | 0.067  | 0.073  | 0.078        | 0.079  | 0.077  | 0.089  |
|           | PCA | 25   | 0.070       | 0.069  | 0.069  | 0.078  | 0.064        | 0.072  | 0.071  | 0.070  | 0.082        | 0.082  | 0.078  | 0.091  |
|           |     | 2    | 0.077       | 0.078  | 0.077  | 0.597  | 0.077        | 0.075  | 0.076  | 0.150  | 0.076        | 0.075  | 0.076  | 0.166  |
|           |     | 10   | 0.078       | 0.078  | 0.070  | 0.072  | 0.079        | 0.056  | 0.075  | 0.071  | 0.074        | 0.067  | 0.072  | 0.083  |
|           |     | 15   | 0.070       | 0.074  | 0.070  | 0.073  | 0.077        | 0.064  | 0.084  | 0.070  | 0.077        | 0.069  | 0.074  | 0.084  |
|           |     | 20   | 0.074       | 0.069  | 0.077  | 0.075  | 0.078        | 0.065  | 0.077  | 0.073  | 0.077        | 0.070  | 0.076  | 0.083  |
|           |     | 25   | 0.082       | 0.069  | 0.081  | 0.075  | 0.083        | 0.070  | 0.079  | 0.075  | 0.081        | 0.071  | 0.078  | 0.081  |
| $\lambda$ | SDR | 0    | 18.425      | 18.425 | 18.425 | 18.425 | 18.425       | 18.425 | 18.425 | 18.425 | 18.425       | 18.425 | 18.425 | 18.425 |
|           |     | 2    | 1.206       | 1.205  | 1.202  | 1.226  | 1.211        | 1.221  | 1.203  | 1.228  | 1.212        | 1.213  | 1.201  | 1.380  |
|           |     | 10   | 1.194       | 1.129  | 1.205  | 1.192  | 1.285        | 1.182  | 1.271  | 1.184  | 1.259        | 1.271  | 1.207  | 1.315  |
|           |     | 15   | 1.149       | 1.134  | 1.207  | 1.215  | 1.251        | 1.106  | 1.122  | 1.210  | 1.286        | 1.181  | 1.227  | 1.296  |
|           |     | 20   | 1.167       | 1.135  | 1.145  | 1.222  | 1.111        | 1.170  | 1.189  | 1.197  | 1.256        | 1.213  | 1.230  | 1.272  |
|           | PCA | 25   | 1.161       | 1.176  | 1.206  | 1.230  | 1.122        | 1.227  | 1.209  | 1.158  | 1.285        | 1.219  | 1.268  | 1.324  |
|           |     | 2    | 1.200       | 1.189  | 1.195  | 14.386 | 1.223        | 1.206  | 1.209  | 1.832  | 1.228        | 1.209  | 1.208  | 1.941  |
|           |     | 10   | 1.207       | 1.203  | 1.152  | 1.190  | 1.222        | 1.029  | 1.213  | 1.173  | 1.180        | 1.120  | 1.177  | 1.260  |
|           |     | 15   | 1.177       | 1.166  | 1.190  | 1.179  | 1.234        | 1.120  | 1.265  | 1.150  | 1.219        | 1.155  | 1.211  | 1.204  |
|           |     | 20   | 1.210       | 1.156  | 1.248  | 1.190  | 1.223        | 1.126  | 1.245  | 1.181  | 1.186        | 1.138  | 1.235  | 1.215  |
|           |     | 25   | 1.230       | 1.174  | 1.272  | 1.204  | 1.249        | 1.188  | 1.295  | 1.187  | 1.209        | 1.181  | 1.263  | 1.235  |

Table 8: Association testing results on CVs in simulation 1.

| TypeI     | #PCs |    | w/o pruning |       |       |       | with pruning |       |       |       | 10000 pruned |       |       |       |
|-----------|------|----|-------------|-------|-------|-------|--------------|-------|-------|-------|--------------|-------|-------|-------|
|           |      |    | all         | CVs   | LFVs  | RVs   | all          | CVs   | LFVs  | RVs   | all          | CVs   | LFVs  | RVs   |
| TypeI     | SDR  | 0  | 0.134       | 0.134 | 0.134 | 0.134 | 0.134        | 0.134 | 0.134 | 0.134 | 0.134        | 0.134 | 0.134 | 0.134 |
|           |      | 2  | 0.159       | 0.159 | 0.160 | 0.167 | 0.162        | 0.162 | 0.160 | 0.159 | 0.161        | 0.162 | 0.156 | 0.161 |
|           |      | 10 | 0.077       | 0.083 | 0.102 | 0.094 | 0.118        | 0.063 | 0.091 | 0.092 | 0.139        | 0.089 | 0.071 | 0.104 |
|           |      | 15 | 0.077       | 0.068 | 0.093 | 0.095 | 0.077        | 0.033 | 0.071 | 0.095 | 0.092        | 0.069 | 0.063 | 0.101 |
|           |      | 20 | 0.076       | 0.066 | 0.089 | 0.092 | 0.067        | 0.067 | 0.069 | 0.097 | 0.085        | 0.060 | 0.067 | 0.104 |
|           | PCA  | 25 |             | 0.077 | 0.089 | 0.087 | 0.089        | 0.073 | 0.078 | 0.088 | 0.089        | 0.078 | 0.066 | 0.108 |
|           |      | 2  | 0.109       | 0.069 | 0.129 | 0.135 | 0.153        | 0.128 | 0.114 | 0.134 | 0.155        | 0.125 | 0.113 | 0.135 |
|           |      | 10 | 0.096       | 0.093 | 0.110 | 0.194 | 0.104        | 0.061 | 0.099 | 0.111 | 0.106        | 0.072 | 0.097 | 0.119 |
|           |      | 15 | 0.100       | 0.093 | 0.111 | 0.161 | 0.100        | 0.071 | 0.097 | 0.114 | 0.103        | 0.068 | 0.096 | 0.131 |
|           |      | 20 | 0.103       | 0.089 | 0.114 | 0.094 | 0.102        | 0.065 | 0.083 | 0.116 | 0.104        | 0.063 | 0.096 | 0.139 |
|           |      | 25 | 0.103       | 0.087 | 0.115 | 0.100 | 0.105        | 0.081 | 0.079 | 0.121 | 0.106        | 0.071 | 0.093 | 0.138 |
| $\lambda$ | SDR  | 0  | 1.711       | 1.711 | 1.711 | 1.711 | 1.711        | 1.711 | 1.711 | 1.711 | 1.711        | 1.711 | 1.711 | 1.711 |
|           |      | 2  | 1.950       | 1.961 | 1.944 | 1.996 | 1.984        | 1.994 | 1.931 | 1.963 | 1.988        | 1.991 | 1.921 | 1.946 |
|           |      | 10 | 1.221       | 1.232 | 1.452 | 1.400 | 1.611        | 1.120 | 1.310 | 1.335 | 1.769        | 1.322 | 1.188 | 1.459 |
|           |      | 15 | 1.246       | 1.160 | 1.370 | 1.397 | 1.213        | 0.872 | 1.191 | 1.371 | 1.387        | 1.189 | 1.151 | 1.430 |
|           |      | 20 | 1.269       | 1.159 | 1.350 | 1.343 | 1.241        | 1.181 | 1.179 | 1.405 | 1.352        | 1.074 | 1.154 | 1.434 |
|           | PCA  | 25 |             | 1.234 | 1.331 | 1.326 | 1.363        | 1.291 | 1.271 | 1.317 | 1.357        | 1.241 | 1.136 | 1.468 |
|           |      | 2  | 1.492       | 1.198 | 1.692 | 1.708 | 1.903        | 1.698 | 1.530 | 1.728 | 1.930        | 1.659 | 1.520 | 1.733 |
|           |      | 10 | 1.375       | 1.377 | 1.484 | 2.301 | 1.482        | 1.146 | 1.427 | 1.493 | 1.498        | 1.232 | 1.424 | 1.608 |
|           |      | 15 | 1.416       | 1.358 | 1.502 | 1.935 | 1.449        | 1.205 | 1.415 | 1.535 | 1.483        | 1.213 | 1.408 | 1.717 |
|           |      | 20 | 1.436       | 1.361 | 1.533 | 1.380 | 1.468        | 1.213 | 1.333 | 1.558 | 1.490        | 1.133 | 1.428 | 1.779 |
|           |      | 25 | 1.445       | 1.367 | 1.541 | 1.415 | 1.477        | 1.300 | 1.274 | 1.583 | 1.480        | 1.173 | 1.420 | 1.759 |

Table 9: Association testing results on CVs in simulation 3.

| TypeI     | #PCs |    | w/o pruning |        |        |        | with pruning |        |        |        | 10000 pruned |        |        |        |
|-----------|------|----|-------------|--------|--------|--------|--------------|--------|--------|--------|--------------|--------|--------|--------|
|           |      |    | all         | CVs    | LFVs   | RVs    | all          | CVs    | LFVs   | RVs    | all          | CVs    | LFVs   | RVs    |
| TypeI     | SDR  | 0  | 0.625       | 0.625  | 0.625  | 0.625  | 0.625        | 0.625  | 0.625  | 0.625  | 0.625        | 0.625  | 0.625  | 0.625  |
|           |      | 2  | 0.172       | 0.175  | 0.153  | 0.129  | 0.155        | 0.169  | 0.157  | 0.187  | 0.153        | 0.169  | 0.152  | 0.164  |
|           |      | 10 | 0.073       | 0.073  | 0.089  | 0.133  | 0.064        | 0.050  | 0.079  | 0.142  | 0.077        | 0.072  | 0.088  | 0.102  |
|           |      | 15 | 0.071       | 0.071  | 0.075  | 0.139  | 0.073        | 0.089  | 0.089  | 0.077  | 0.075        | 0.083  | 0.077  | 0.097  |
|           |      | 20 | 0.072       | 0.077  | 0.084  | 0.139  | 0.129        | 0.105  | 0.149  | 0.094  | 0.067        | 0.099  | 0.094  | 0.095  |
|           | PCA  | 25 | 0.081       | 0.078  | 0.095  | 0.107  | 0.029        | 0.144  | 0.163  | 0.084  | 0.069        | 0.146  | 0.117  | 0.102  |
|           |      | 2  | 0.095       | 0.074  | 0.135  | 0.622  | 0.123        | 0.134  | 0.109  | 0.620  | 0.137        | 0.129  | 0.108  | 0.623  |
|           |      | 10 | 0.068       | 0.067  | 0.130  | 0.156  | 0.076        | 0.073  | 0.081  | 0.163  | 0.127        | 0.071  | 0.068  | 0.167  |
|           |      | 15 | 0.068       | 0.068  | 0.137  | 0.171  | 0.074        | 0.077  | 0.077  | 0.148  | 0.067        | 0.077  | 0.067  | 0.165  |
|           |      | 20 | 0.079       | 0.074  | 0.143  | 0.172  | 0.074        | 0.075  | 0.083  | 0.139  | 0.069        | 0.076  | 0.074  | 0.154  |
|           |      | 25 | 0.087       | 0.083  | 0.136  | 0.166  | 0.078        | 0.083  | 0.092  | 0.129  | 0.070        | 0.083  | 0.078  | 0.157  |
| $\lambda$ | SDR  | 0  | 16.542      | 16.542 | 16.542 | 16.542 | 16.542       | 16.542 | 16.542 | 16.542 | 16.542       | 16.542 | 16.542 | 16.542 |
|           |      | 2  | 2.005       | 2.052  | 1.828  | 1.614  | 1.841        | 1.974  | 1.855  | 2.184  | 1.807        | 1.974  | 1.824  | 1.960  |
|           |      | 10 | 1.283       | 1.263  | 1.316  | 1.667  | 1.147        | 0.975  | 1.178  | 1.751  | 1.186        | 1.147  | 1.328  | 1.390  |
|           |      | 15 | 1.185       | 1.203  | 1.266  | 1.721  | 1.253        | 1.371  | 1.396  | 1.176  | 1.175        | 1.308  | 1.288  | 1.413  |
|           |      | 20 | 1.224       | 1.234  | 1.324  | 1.729  | 1.787        | 1.513  | 1.906  | 1.314  | 1.138        | 1.429  | 1.428  | 1.396  |
|           | PCA  | 25 | 1.264       | 1.278  | 1.427  | 1.367  | 0.825        | 1.899  | 2.023  | 1.288  | 1.175        | 1.826  | 1.618  | 1.432  |
|           |      | 2  | 1.350       | 1.203  | 1.709  | 16.466 | 1.584        | 1.665  | 1.431  | 16.176 | 1.716        | 1.605  | 1.440  | 16.476 |
|           |      | 10 | 1.183       | 1.161  | 1.713  | 1.873  | 1.221        | 1.212  | 1.255  | 1.965  | 1.611        | 1.193  | 1.187  | 1.945  |
|           |      | 15 | 1.162       | 1.166  | 1.762  | 2.046  | 1.211        | 1.262  | 1.262  | 1.839  | 1.135        | 1.259  | 1.149  | 1.964  |
|           |      | 20 | 1.256       | 1.225  | 1.771  | 2.040  | 1.251        | 1.280  | 1.304  | 1.742  | 1.156        | 1.260  | 1.228  | 1.896  |
|           |      | 25 | 1.328       | 1.302  | 1.734  | 1.991  | 1.247        | 1.322  | 1.380  | 1.657  | 1.170        | 1.294  | 1.268  | 1.946  |

Table 10: Association testing results on CVs in simulation 1 with AMR samples excluded.

|       |           |       | w/o pruning |       |       |       | with pruning |       |       |       | 10000 pruned |       |       |       |       |
|-------|-----------|-------|-------------|-------|-------|-------|--------------|-------|-------|-------|--------------|-------|-------|-------|-------|
|       |           |       | all         | CVs   | LFVs  | RVs   | all          | CVs   | LFVs  | RVs   | all          | CVs   | LFVs  | RVs   |       |
| TypeI | SDR       | 0     | 0.154       | 0.154 | 0.154 | 0.154 | 0.154        | 0.154 | 0.154 | 0.154 | 0.154        | 0.154 | 0.154 | 0.154 |       |
|       |           | 2     | 0.131       | 0.131 | 0.135 | 0.113 | 0.132        | 0.135 | 0.146 | 0.117 | 0.133        | 0.131 | 0.141 | 0.135 |       |
|       |           | 10    | 0.088       | 0.063 | 0.088 | 0.089 | 0.084        | 0.056 | 0.074 | 0.079 | 0.079        | 0.077 | 0.080 | 0.089 |       |
|       |           | 15    | 0.065       | 0.065 | 0.090 | 0.090 | 0.090        | 0.060 | 0.060 | 0.080 | 0.076        | 0.065 | 0.072 | 0.086 |       |
|       |           | 20    | 0.069       | 0.069 | 0.079 | 0.083 | 0.062        | 0.065 | 0.064 | 0.075 | 0.082        | 0.077 | 0.075 | 0.084 |       |
|       | PCA       | 25    | 0.071       | 0.071 | 0.073 | 0.079 | 0.065        | 0.069 | 0.068 | 0.073 | 0.081        | 0.080 | 0.075 | 0.085 |       |
|       |           | 2     | 0.138       | 0.130 | 0.136 | 0.131 | 0.135        | 0.137 | 0.127 | 0.154 | 0.134        | 0.135 | 0.127 | 0.143 |       |
|       |           | 10    | 0.086       | 0.075 | 0.137 | 0.150 | 0.091        | 0.063 | 0.086 | 0.140 | 0.093        | 0.067 | 0.087 | 0.140 |       |
|       |           | 15    | 0.087       | 0.076 | 0.138 | 0.151 | 0.091        | 0.060 | 0.081 | 0.136 | 0.092        | 0.066 | 0.085 | 0.143 |       |
|       |           | 20    | 0.086       | 0.076 | 0.139 | 0.146 | 0.092        | 0.068 | 0.083 | 0.137 | 0.093        | 0.069 | 0.085 | 0.141 |       |
|       | 25        | 0.090 | 0.078       | 0.132 | 0.143 | 0.092 | 0.071        | 0.082 | 0.143 | 0.097 | 0.072        | 0.087 | 0.143 |       |       |
|       | $\lambda$ | SDR   | 0           | 1.916 | 1.916 | 1.916 | 1.916        | 1.916 | 1.916 | 1.916 | 1.916        | 1.916 | 1.916 | 1.916 |       |
|       |           |       | 2           | 1.744 | 1.741 | 1.754 | 1.578        | 1.731 | 1.772 | 1.842 | 1.604        | 1.735 | 1.748 | 1.793 | 1.727 |
|       |           |       | 10          | 1.286 | 1.127 | 1.312 | 1.384        | 1.284 | 1.083 | 1.226 | 1.190        | 1.273 | 1.218 | 1.279 | 1.358 |
|       |           |       | 15          | 1.099 | 1.113 | 1.324 | 1.389        | 1.301 | 1.094 | 1.061 | 1.211        | 1.265 | 1.145 | 1.202 | 1.313 |
| 20    |           |       | 1.148       | 1.171 | 1.266 | 1.314 | 1.111        | 1.130 | 1.090 | 1.203 | 1.278        | 1.234 | 1.213 | 1.326 |       |
| PCA   |           | 25    | 1.142       | 1.177 | 1.207 | 1.248 | 1.136        | 1.161 | 1.118 | 1.229 | 1.263        | 1.285 | 1.223 | 1.340 |       |
|       |           | 2     | 1.715       | 1.639 | 1.718 | 1.689 | 1.676        | 1.707 | 1.663 | 1.920 | 1.665        | 1.708 | 1.654 | 1.793 |       |
|       |           | 10    | 1.255       | 1.191 | 1.810 | 1.843 | 1.396        | 1.088 | 1.344 | 1.777 | 1.422        | 1.197 | 1.347 | 1.766 |       |
|       |           | 15    | 1.240       | 1.206 | 1.804 | 1.853 | 1.415        | 1.090 | 1.297 | 1.752 | 1.427        | 1.178 | 1.336 | 1.791 |       |
|       |           | 20    | 1.263       | 1.192 | 1.809 | 1.824 | 1.411        | 1.145 | 1.298 | 1.763 | 1.438        | 1.164 | 1.365 | 1.787 |       |
| 25    | 1.296     | 1.192 | 1.729       | 1.806 | 1.402 | 1.123 | 1.273        | 1.782 | 1.448 | 1.216 | 1.366        | 1.787 |       |       |       |

Table 11: Association testing results on CVs in simulation 3 with AMR samples excluded.

|           |     |    | w/o pruning |        |        |        | with pruning |        |        |        | 10000 pruned |        |        |        |
|-----------|-----|----|-------------|--------|--------|--------|--------------|--------|--------|--------|--------------|--------|--------|--------|
|           |     |    | all         | CVs    | LFVs   | RVs    | all          | CVs    | LFVs   | RVs    | all          | CVs    | LFVs   | RVs    |
| Type I    | SDR | 0  | 0.571       | 0.571  | 0.571  | 0.571  | 0.571        | 0.571  | 0.571  | 0.571  | 0.571        | 0.571  | 0.571  | 0.571  |
|           |     | 2  | 0.103       | 0.103  | 0.103  | 0.116  | 0.105        | 0.105  | 0.093  | 0.116  | 0.105        | 0.105  | 0.093  | 0.151  |
|           |     | 10 | 0.077       | 0.066  | 0.071  | 0.108  | 0.075        | 0.074  | 0.073  | 0.088  | 0.067        | 0.074  | 0.071  | 0.098  |
|           |     | 15 | 0.062       | 0.066  | 0.077  | 0.106  | 0.063        | 0.067  | 0.066  | 0.086  | 0.073        | 0.076  | 0.071  | 0.097  |
|           |     | 20 | 0.068       | 0.069  | 0.060  | 0.102  | 0.067        | 0.070  | 0.070  | 0.068  | 0.075        | 0.072  | 0.077  | 0.095  |
|           |     | 25 | 0.069       | 0.069  | 0.065  | 0.094  | 0.071        | 0.076  | 0.076  | 0.069  | 0.077        | 0.076  | 0.080  | 0.093  |
|           | PCA | 2  | 0.115       | 0.115  | 0.114  | 0.547  | 0.103        | 0.102  | 0.103  | 0.144  | 0.102        | 0.098  | 0.103  | 0.160  |
|           |     | 10 | 0.077       | 0.076  | 0.091  | 0.094  | 0.068        | 0.058  | 0.061  | 0.092  | 0.077        | 0.063  | 0.059  | 0.107  |
|           |     | 15 | 0.072       | 0.070  | 0.069  | 0.095  | 0.069        | 0.064  | 0.067  | 0.092  | 0.073        | 0.067  | 0.060  | 0.111  |
|           |     | 20 | 0.075       | 0.066  | 0.077  | 0.096  | 0.070        | 0.071  | 0.065  | 0.091  | 0.073        | 0.066  | 0.062  | 0.114  |
|           |     | 25 | 0.078       | 0.067  | 0.082  | 0.097  | 0.072        | 0.071  | 0.068  | 0.093  | 0.077        | 0.067  | 0.065  | 0.116  |
|           |     |    |             |        |        |        |              |        |        |        |              |        |        |        |
| $\lambda$ | SDR | 0  | 12.190      | 12.190 | 12.190 | 12.190 | 12.190       | 12.190 | 12.190 | 12.190 | 12.190       | 12.190 | 12.190 | 12.190 |
|           |     | 2  | 1.450       | 1.446  | 1.433  | 1.549  | 1.461        | 1.449  | 1.341  | 1.558  | 1.453        | 1.446  | 1.356  | 1.853  |
|           |     | 10 | 1.205       | 1.142  | 1.146  | 1.401  | 1.156        | 1.148  | 1.153  | 1.258  | 1.112        | 1.162  | 1.141  | 1.356  |
|           |     | 15 | 1.150       | 1.138  | 1.210  | 1.397  | 1.102        | 1.154  | 1.152  | 1.251  | 1.207        | 1.169  | 1.187  | 1.337  |
|           |     | 20 | 1.178       | 1.136  | 1.108  | 1.358  | 1.149        | 1.200  | 1.216  | 1.156  | 1.240        | 1.138  | 1.236  | 1.313  |
|           |     | 25 | 1.174       | 1.158  | 1.181  | 1.323  | 1.196        | 1.225  | 1.226  | 1.124  | 1.265        | 1.161  | 1.283  | 1.328  |
|           | PCA | 2  | 1.484       | 1.513  | 1.453  | 10.795 | 1.419        | 1.363  | 1.420  | 1.831  | 1.404        | 1.342  | 1.416  | 2.008  |
|           |     | 10 | 1.162       | 1.203  | 1.331  | 1.319  | 1.152        | 1.036  | 1.076  | 1.259  | 1.221        | 1.079  | 1.083  | 1.471  |
|           |     | 15 | 1.152       | 1.143  | 1.185  | 1.314  | 1.174        | 1.120  | 1.161  | 1.268  | 1.219        | 1.102  | 1.084  | 1.455  |
|           |     | 20 | 1.175       | 1.153  | 1.221  | 1.320  | 1.166        | 1.162  | 1.160  | 1.274  | 1.217        | 1.110  | 1.095  | 1.475  |
|           |     | 25 | 1.219       | 1.155  | 1.224  | 1.326  | 1.176        | 1.207  | 1.168  | 1.310  | 1.246        | 1.157  | 1.115  | 1.498  |
|           |     |    |             |        |        |        |              |        |        |        |              |        |        |        |

Table 12: Association testing results on RVs in simulation 1.

|        |     | #PCs | Tests | w/o pruning |       |       |       | with pruning |       |       |       | 10000 pruned |       |       |       |
|--------|-----|------|-------|-------------|-------|-------|-------|--------------|-------|-------|-------|--------------|-------|-------|-------|
|        |     |      |       | all         | CVs   | LFVs  | RVs   | all          | CVs   | LFVs  | RVs   | all          | CVs   | LFVs  | RVs   |
| Type I | SDR | 0    | T1    | 0.136       | 0.136 | 0.136 | 0.136 | 0.136        | 0.136 | 0.136 | 0.136 | 0.136        | 0.136 | 0.136 | 0.136 |
|        |     |      | Fp    | 0.136       | 0.136 | 0.136 | 0.136 | 0.136        | 0.136 | 0.136 | 0.136 | 0.136        | 0.136 | 0.136 | 0.136 |
|        |     | 10   | T1    | 0.062       | 0.056 | 0.076 | 0.073 | 0.114        | 0.058 | 0.105 | 0.081 | 0.140        | 0.084 | 0.079 | 0.095 |
|        |     |      | Fp    | 0.060       | 0.057 | 0.074 | 0.071 | 0.110        | 0.056 | 0.104 | 0.081 | 0.135        | 0.083 | 0.077 | 0.096 |
|        |     | 25   | T1    |             | 0.071 | 0.065 | 0.072 | 0.100        | 0.099 | 0.078 | 0.092 | 0.097        | 0.107 | 0.057 | 0.089 |
|        |     |      | Fp    |             | 0.071 | 0.065 | 0.072 | 0.098        | 0.100 | 0.075 | 0.093 | 0.098        | 0.106 | 0.057 | 0.089 |
|        | PCA | 10   | T1    | 0.090       | 0.098 | 0.083 | 0.112 | 0.088        | 0.096 | 0.127 | 0.097 | 0.086        | 0.101 | 0.112 | 0.095 |
|        |     |      | Fp    | 0.089       | 0.097 | 0.082 | 0.106 | 0.088        | 0.096 | 0.126 | 0.096 | 0.085        | 0.100 | 0.111 | 0.092 |
|        |     | 25   | T1    | 0.080       | 0.094 | 0.081 | 0.087 | 0.103        | 0.101 | 0.077 | 0.085 | 0.103        | 0.094 | 0.093 | 0.085 |
|        |     |      | Fp    | 0.079       | 0.092 | 0.081 | 0.086 | 0.101        | 0.103 | 0.075 | 0.084 | 0.100        | 0.094 | 0.094 | 0.082 |

  

|           |     |    |    |       |       |       |       |       |       |       |       |       |       |       |       |
|-----------|-----|----|----|-------|-------|-------|-------|-------|-------|-------|-------|-------|-------|-------|-------|
| $\lambda$ | SDR | 0  | T1 | 1.795 | 1.795 | 1.795 | 1.795 | 1.795 | 1.795 | 1.795 | 1.795 | 1.795 | 1.795 | 1.795 | 1.795 |
|           |     |    | Fp | 1.795 | 1.795 | 1.795 | 1.795 | 1.795 | 1.795 | 1.795 | 1.795 | 1.795 | 1.795 | 1.795 | 1.795 |
|           |     | 10 | T1 | 1.170 | 1.122 | 1.176 | 1.190 | 1.592 | 1.059 | 1.635 | 1.281 | 1.826 | 1.260 | 1.234 | 1.440 |
|           |     |    | Fp | 1.165 | 1.135 | 1.191 | 1.179 | 1.551 | 1.056 | 1.618 | 1.299 | 1.827 | 1.243 | 1.264 | 1.409 |
|           |     | 25 | T1 |       | 1.271 | 1.208 | 1.274 | 1.428 | 1.353 | 1.295 | 1.398 | 1.453 | 1.463 | 1.017 | 1.334 |
|           |     |    | Fp |       | 1.242 | 1.183 | 1.292 | 1.439 | 1.350 | 1.265 | 1.391 | 1.434 | 1.451 | 1.037 | 1.335 |
|           | PCA | 10 | T1 | 1.464 | 1.544 | 1.273 | 1.583 | 1.291 | 1.430 | 1.742 | 1.399 | 1.263 | 1.446 | 1.604 | 1.429 |
|           |     |    | Fp | 1.497 | 1.587 | 1.244 | 1.552 | 1.306 | 1.453 | 1.776 | 1.368 | 1.268 | 1.456 | 1.655 | 1.369 |
|           |     | 25 | T1 | 1.274 | 1.427 | 1.278 | 1.326 | 1.416 | 1.441 | 1.258 | 1.278 | 1.443 | 1.370 | 1.353 | 1.274 |
|           |     |    | Fp | 1.297 | 1.411 | 1.240 | 1.332 | 1.423 | 1.455 | 1.265 | 1.245 | 1.445 | 1.375 | 1.379 | 1.250 |

Table 13: Association testing results on RVs in simulation 3.

|        |     | #PCs | Tests | w/o pruning |       |       |       | with pruning |       |       |       | 10000 pruned |       |       |       |
|--------|-----|------|-------|-------------|-------|-------|-------|--------------|-------|-------|-------|--------------|-------|-------|-------|
|        |     |      |       | all         | CVs   | LFVs  | RVs   | all          | CVs   | LFVs  | RVs   | all          | CVs   | LFVs  | RVs   |
| Type I | SDR | 0    | T1    | 0.277       | 0.277 | 0.277 | 0.277 | 0.277        | 0.277 | 0.277 | 0.277 | 0.277        | 0.277 | 0.277 | 0.277 |
|        |     |      | Fp    | 0.249       | 0.249 | 0.249 | 0.249 | 0.249        | 0.249 | 0.249 | 0.249 | 0.249        | 0.249 | 0.249 | 0.249 |
|        |     | 10   | T1    | 0.069       | 0.066 | 0.074 | 0.100 | 0.062        | 0.037 | 0.065 | 0.140 | 0.071        | 0.049 | 0.075 | 0.129 |
|        |     |      | Fp    | 0.069       | 0.067 | 0.074 | 0.098 | 0.062        | 0.038 | 0.064 | 0.140 | 0.069        | 0.049 | 0.073 | 0.132 |
|        |     | 25   | T1    | 0.073       | 0.070 | 0.088 | 0.107 |              | 0.118 |       | 0.126 | 0.060        | 0.081 | 0.095 | 0.114 |
|        |     |      | Fp    | 0.073       | 0.073 | 0.088 | 0.105 |              | 0.119 |       | 0.129 | 0.061        | 0.084 | 0.094 | 0.113 |
|        | PCA | 10   | T1    | 0.187       | 0.160 | 0.234 | 0.197 | 0.080        | 0.140 | 0.109 | 0.139 | 0.229        | 0.136 | 0.122 | 0.185 |
|        |     |      | Fp    | 0.191       | 0.165 | 0.237 | 0.201 | 0.078        | 0.145 | 0.109 | 0.138 | 0.234        | 0.139 | 0.122 | 0.185 |
|        |     | 25   | T1    | 0.085       | 0.095 | 0.176 | 0.140 | 0.079        | 0.117 | 0.099 | 0.088 | 0.096        | 0.131 | 0.093 | 0.139 |
|        |     |      | Fp    | 0.084       | 0.093 | 0.177 | 0.137 | 0.081        | 0.122 | 0.099 | 0.085 | 0.097        | 0.136 | 0.093 | 0.137 |

  

|           |     |    |    |       |       |       |       |       |       |       |       |       |       |       |       |
|-----------|-----|----|----|-------|-------|-------|-------|-------|-------|-------|-------|-------|-------|-------|-------|
| $\lambda$ | SDR | 0  | T1 | 3.567 | 3.567 | 3.567 | 3.567 | 3.567 | 3.567 | 3.567 | 3.567 | 3.567 | 3.567 | 3.567 | 3.567 |
|           |     |    | Fp | 3.166 | 3.166 | 3.166 | 3.166 | 3.166 | 3.166 | 3.166 | 3.166 | 3.166 | 3.166 | 3.166 | 3.166 |
|           |     | 10 | T1 | 1.123 | 1.106 | 1.287 | 1.540 | 1.071 | 0.849 | 1.110 | 1.976 | 1.151 | 0.971 | 1.263 | 1.686 |
|           |     |    | Fp | 1.143 | 1.151 | 1.289 | 1.530 | 1.075 | 0.845 | 1.119 | 1.979 | 1.160 | 0.970 | 1.232 | 1.699 |
|           |     | 25 | T1 | 1.215 | 1.186 | 1.363 | 1.487 |       | 1.566 |       | 1.747 | 1.052 | 1.276 | 1.413 | 1.509 |
|           |     |    | Fp | 1.208 | 1.201 | 1.335 | 1.479 |       | 1.522 |       | 1.797 | 1.088 | 1.275 | 1.408 | 1.516 |
|           | PCA | 10 | T1 | 2.453 | 2.130 | 3.231 | 2.684 | 1.283 | 1.941 | 1.565 | 1.868 | 2.978 | 1.878 | 1.720 | 2.537 |
|           |     |    | Fp | 2.481 | 2.194 | 3.254 | 2.705 | 1.297 | 1.986 | 1.573 | 1.848 | 3.058 | 1.906 | 1.753 | 2.556 |
|           |     | 25 | T1 | 1.328 | 1.433 | 2.445 | 1.911 | 1.233 | 1.653 | 1.378 | 1.364 | 1.434 | 1.785 | 1.375 | 1.936 |
|           |     |    | Fp | 1.327 | 1.483 | 2.451 | 1.915 | 1.216 | 1.669 | 1.354 | 1.347 | 1.449 | 1.810 | 1.389 | 1.911 |

Table 14: Association testing results on LFVs in sim 1.

|           |     | #PCs | Tests | w/o pruning |       |       |       | with pruning |              |       |       | 10000 pruned |              |              |       |
|-----------|-----|------|-------|-------------|-------|-------|-------|--------------|--------------|-------|-------|--------------|--------------|--------------|-------|
|           |     |      |       | all         | CVs   | LFVs  | RVs   | all          | CVs          | LFVs  | RVs   | all          | CVs          | LFVs         | RVs   |
| Type I    | SDR | 0    | T5    | 0.159       | 0.159 | 0.159 | 0.159 | 0.159        | 0.159        | 0.159 | 0.159 | 0.159        | 0.159        | 0.159        | 0.163 |
|           |     |      | Fp    | 0.159       | 0.159 | 0.159 | 0.159 | 0.159        | 0.159        | 0.159 | 0.159 | 0.159        | 0.159        | 0.159        | 0.164 |
|           |     | 10   | T1    | 0.086       | 0.084 | 0.089 | 0.080 | 0.149        | <b>0.061</b> | 0.100 | 0.087 | 0.163        | 0.088        | 0.064        | 0.098 |
|           |     |      | Fp    | 0.088       | 0.082 | 0.092 | 0.077 | 0.154        | <b>0.063</b> | 0.107 | 0.085 | 0.164        | 0.091        | 0.070        | 0.096 |
|           |     | 25   | T5    |             | 0.081 | 0.094 | 0.096 | 0.096        | 0.078        | 0.074 | 0.091 | 0.076        | 0.079        | <b>0.057</b> | 0.098 |
|           |     |      | Fp    |             | 0.084 | 0.091 | 0.094 | 0.095        | 0.080        | 0.075 | 0.092 | 0.079        | 0.079        | <b>0.058</b> | 0.093 |
|           | PCA | 10   | T5    | 0.097       | 0.093 | 0.103 | 0.175 | 0.086        | <b>0.052</b> | 0.094 | 0.109 | 0.081        | <b>0.065</b> | 0.080        | 0.097 |
|           |     |      | Fp    | 0.100       | 0.097 | 0.106 | 0.169 | 0.088        | <b>0.056</b> | 0.096 | 0.110 | 0.080        | <b>0.066</b> | 0.082        | 0.098 |
|           |     | 25   | T1    | 0.108       | 0.086 | 0.106 | 0.090 | 0.091        | 0.077        | 0.072 | 0.116 | 0.086        | 0.070        | 0.078        | 0.101 |
|           |     |      | Fp    | 0.110       | 0.085 | 0.109 | 0.092 | 0.091        | 0.083        | 0.070 | 0.116 | 0.087        | 0.071        | 0.075        | 0.098 |
| $\lambda$ | SDR | 0    | T5    | 1.816       | 1.816 | 1.816 | 1.816 | 1.816        | 1.816        | 1.816 | 1.816 | 1.816        | 1.816        | 1.816        | 1.823 |
|           |     |      | Fp    | 1.849       | 1.849 | 1.849 | 1.849 | 1.849        | 1.849        | 1.849 | 1.849 | 1.849        | 1.849        | 1.849        | 1.853 |
|           |     | 10   | T5    | 1.307       | 1.272 | 1.334 | 1.287 | 1.706        | <b>1.164</b> | 1.504 | 1.357 | 1.906        | 1.295        | 1.198        | 1.463 |
|           |     |      | Fp    | 1.317       | 1.270 | 1.348 | 1.240 | 1.703        | <b>1.166</b> | 1.539 | 1.332 | 1.890        | 1.370        | 1.211        | 1.454 |
|           |     | 25   | T5    |             | 1.265 | 1.362 | 1.350 | 1.379        | 1.199        | 1.228 | 1.397 | 1.304        | 1.236        | <b>1.068</b> | 1.435 |
|           |     |      | Fp    |             | 1.293 | 1.341 | 1.333 | 1.409        | 1.200        | 1.204 | 1.393 | 1.302        | 1.240        | <b>1.058</b> | 1.423 |
|           | PCA | 10   | T5    | 1.394       | 1.347 | 1.425 | 2.072 | 1.313        | <b>1.046</b> | 1.406 | 1.533 | 1.298        | <b>1.140</b> | 1.266        | 1.444 |
|           |     |      | Fp    | 1.434       | 1.412 | 1.461 | 1.964 | 1.306        | <b>1.067</b> | 1.437 | 1.540 | 1.305        | <b>1.144</b> | 1.297        | 1.456 |
|           |     | 25   | T5    | 1.444       | 1.317 | 1.460 | 1.356 | 1.351        | 1.278        | 1.221 | 1.546 | 1.370        | 1.163        | 1.254        | 1.468 |
|           |     |      | Fp    | 1.458       | 1.316 | 1.478 | 1.377 | 1.353        | 1.286        | 1.218 | 1.518 | 1.385        | 1.210        | 1.228        | 1.441 |

Table 15: Association testing results on LFVs in sim 2.

|           |     | #PCs | Tests | w/o pruning |        |        |        | with pruning |        |        |        | 10000 pruned |        |        |        |
|-----------|-----|------|-------|-------------|--------|--------|--------|--------------|--------|--------|--------|--------------|--------|--------|--------|
|           |     |      |       | all         | CVs    | LFVs   | RVs    | all          | CVs    | LFVs   | RVs    | all          | CVs    | LFVs   | RVs    |
| Type I    | SDR | 0    | T5    | 0.613       | 0.633  | 0.633  | 0.633  | 0.633        | 0.633  | 0.633  | 0.633  | 0.633        | 0.633  | 0.633  | 0.604  |
|           |     |      | Fp    | 0.578       | 0.596  | 0.596  | 0.596  | 0.596        | 0.596  | 0.596  | 0.596  | 0.596        | 0.596  | 0.596  | 0.566  |
|           |     | 10   | T5    | 0.062       | 0.065  | 0.070  | 0.096  | 0.063        | 0.062  | 0.092  | 0.106  | 0.070        | 0.078  | 0.081  | 0.108  |
|           |     |      | Fp    | 0.059       | 0.062  | 0.068  | 0.091  | 0.064        | 0.060  | 0.092  | 0.100  | 0.069        | 0.078  | 0.082  | 0.105  |
|           |     | 25   | T5    | 0.114       | 0.074  | 0.092  | 0.109  | 0.084        | 0.089  | 0.130  | 0.115  | 0.083        | 0.075  | 0.080  | 0.116  |
|           |     |      | Fp    | 0.119       | 0.078  | 0.092  | 0.105  | 0.085        | 0.093  | 0.131  | 0.110  | 0.083        | 0.077  | 0.082  | 0.113  |
|           | PCA | 10   | T5    | 0.087       | 0.086  | 0.093  | 0.092  | 0.083        | 0.087  | 0.074  | 0.095  | 0.104        | 0.084  | 0.073  | 0.096  |
|           |     |      | Fp    | 0.088       | 0.090  | 0.094  | 0.093  | 0.081        | 0.088  | 0.072  | 0.092  | 0.106        | 0.083  | 0.072  | 0.094  |
|           |     | 25   | T5    | 0.084       | 0.083  | 0.097  | 0.109  | 0.090        | 0.088  | 0.088  | 0.103  | 0.084        | 0.091  | 0.085  | 0.101  |
|           |     |      | Fp    | 0.083       | 0.086  | 0.096  | 0.106  | 0.089        | 0.093  | 0.087  | 0.098  | 0.083        | 0.091  | 0.083  | 0.097  |
| $\lambda$ | SDR | 0    | T5    | 14.816      | 16.658 | 16.658 | 16.658 | 16.658       | 16.658 | 16.658 | 16.658 | 16.658       | 16.658 | 16.658 | 13.876 |
|           |     |      | Fp    | 12.071      | 13.171 | 13.171 | 13.171 | 13.171       | 13.171 | 13.171 | 13.171 | 13.171       | 13.171 | 13.171 | 11.488 |
|           |     | 10   | T5    | 1.104       | 1.103  | 1.223  | 1.381  | 1.145        | 1.091  | 1.397  | 1.487  | 1.156        | 1.217  | 1.285  | 1.556  |
|           |     |      | Fp    | 1.101       | 1.098  | 1.191  | 1.351  | 1.148        | 1.103  | 1.378  | 1.448  | 1.164        | 1.207  | 1.293  | 1.508  |
|           |     | 25   | T5    | 1.598       | 1.257  | 1.367  | 1.516  | 1.300        | 1.343  | 1.756  | 1.606  | 1.280        | 1.283  | 1.287  | 1.630  |
|           |     |      | Fp    | 1.657       | 1.261  | 1.360  | 1.478  | 1.275        | 1.381  | 1.755  | 1.534  | 1.272        | 1.288  | 1.285  | 1.604  |
|           | PCA | 10   | T5    | 1.324       | 1.323  | 1.376  | 1.343  | 1.299        | 1.347  | 1.232  | 1.330  | 1.488        | 1.317  | 1.255  | 1.370  |
|           |     |      | Fp    | 1.331       | 1.339  | 1.392  | 1.351  | 1.283        | 1.335  | 1.241  | 1.326  | 1.495        | 1.301  | 1.243  | 1.366  |
|           |     | 25   | T5    | 1.322       | 1.279  | 1.384  | 1.424  | 1.385        | 1.324  | 1.362  | 1.395  | 1.326        | 1.318  | 1.359  | 1.360  |
|           |     |      | Fp    | 1.307       | 1.298  | 1.381  | 1.407  | 1.364        | 1.331  | 1.367  | 1.340  | 1.310        | 1.362  | 1.333  | 1.351  |

Table 16: Association testing results on LFVs in sim 3.

|           |     | #PCs | Tests | w/o pruning |       |       |       | w/ pruning |       |       |       | 10000 pruned |       |       |       |
|-----------|-----|------|-------|-------------|-------|-------|-------|------------|-------|-------|-------|--------------|-------|-------|-------|
|           |     |      |       | all         | CVs   | LFVs  | RVs   | all        | CVs   | LFVs  | RVs   | all          | CVs   | LFVs  | RVs   |
| Type I    | SDR | 0    | T5    | 0.277       | 0.277 | 0.277 | 0.277 | 0.277      | 0.277 | 0.277 | 0.277 | 0.277        | 0.277 | 0.277 | 0.277 |
|           |     |      | Fp    | 0.249       | 0.249 | 0.249 | 0.249 | 0.249      | 0.249 | 0.249 | 0.249 | 0.249        | 0.249 | 0.249 | 0.249 |
|           |     | 10   | T5    | 0.069       | 0.066 | 0.074 | 0.100 | 0.062      | 0.037 | 0.065 | 0.140 | 0.071        | 0.049 | 0.075 | 0.129 |
|           |     |      | Fp    | 0.069       | 0.067 | 0.074 | 0.098 | 0.062      | 0.038 | 0.064 | 0.140 | 0.069        | 0.049 | 0.073 | 0.132 |
|           |     | 25   | T5    | 0.073       | 0.070 | 0.088 | 0.107 |            | 0.118 |       | 0.126 | 0.060        | 0.081 | 0.095 | 0.114 |
|           |     |      | Fp    | 0.073       | 0.073 | 0.088 | 0.105 |            | 0.119 |       | 0.129 | 0.061        | 0.084 | 0.094 | 0.113 |
|           | PCA | 10   | T5    | 0.187       | 0.160 | 0.234 | 0.197 | 0.080      | 0.140 | 0.109 | 0.139 | 0.229        | 0.136 | 0.122 | 0.185 |
|           |     |      | Fp    | 0.191       | 0.165 | 0.237 | 0.201 | 0.078      | 0.145 | 0.109 | 0.138 | 0.234        | 0.139 | 0.122 | 0.185 |
|           |     | 25   | T5    | 0.085       | 0.095 | 0.176 | 0.140 | 0.079      | 0.117 | 0.099 | 0.088 | 0.096        | 0.131 | 0.093 | 0.139 |
|           |     |      | Fp    | 0.084       | 0.093 | 0.177 | 0.137 | 0.081      | 0.122 | 0.099 | 0.085 | 0.097        | 0.136 | 0.093 | 0.137 |
| $\lambda$ | SDR | 0    | T5    | 3.567       | 3.567 | 3.567 | 3.567 | 3.567      | 3.567 | 3.567 | 3.567 | 3.567        | 3.567 | 3.567 | 3.567 |
|           |     |      | Fp    | 3.166       | 3.166 | 3.166 | 3.166 | 3.166      | 3.166 | 3.166 | 3.166 | 3.166        | 3.166 | 3.166 | 3.166 |
|           |     | 10   | T5    | 1.123       | 1.106 | 1.287 | 1.540 | 1.071      | 0.849 | 1.110 | 1.976 | 1.151        | 0.971 | 1.263 | 1.686 |
|           |     |      | Fp    | 1.143       | 1.151 | 1.289 | 1.530 | 1.075      | 0.845 | 1.119 | 1.979 | 1.160        | 0.970 | 1.232 | 1.699 |
|           |     | 25   | T5    | 1.215       | 1.186 | 1.363 | 1.487 |            | 1.566 |       | 1.747 | 1.052        | 1.276 | 1.413 | 1.509 |
|           |     |      | Fp    | 1.208       | 1.201 | 1.335 | 1.479 |            | 1.522 |       | 1.797 | 1.088        | 1.275 | 1.408 | 1.516 |
|           | PCA | 10   | T5    | 2.453       | 2.130 | 3.231 | 2.684 | 1.283      | 1.941 | 1.565 | 1.868 | 2.978        | 1.878 | 1.720 | 2.537 |
|           |     |      | Fp    | 2.481       | 2.194 | 3.254 | 2.705 | 1.297      | 1.986 | 1.573 | 1.848 | 3.058        | 1.906 | 1.753 | 2.556 |
|           |     | 25   | T5    | 1.328       | 1.433 | 2.445 | 1.911 | 1.233      | 1.653 | 1.378 | 1.364 | 1.434        | 1.785 | 1.375 | 1.936 |
|           |     |      | Fp    | 1.327       | 1.483 | 2.451 | 1.915 | 1.216      | 1.669 | 1.354 | 1.347 | 1.449        | 1.810 | 1.389 | 1.911 |

Table 17: Results of association testing on CVs for two local non-genetic risk regions R1 and R2. The PCs were constructed with unpruned variants.

|           |     | #PCs | R1     |        |        |        | R2    |       |       |       |
|-----------|-----|------|--------|--------|--------|--------|-------|-------|-------|-------|
|           |     |      | all    | CVs    | LFVs   | RVs    | all   | CVs   | LFVs  | RVs   |
| Type I    | SDR | 0    | 0.640  | 0.640  | 0.640  | 0.640  | 0.101 | 0.101 | 0.101 | 0.101 |
|           |     | 2    | 0.141  | 0.142  | 0.135  | 0.258  | 0.063 | 0.062 | 0.061 | 0.082 |
|           |     | 10   | 0.053  | 0.055  | 0.066  | 0.048  | 0.055 | 0.055 | 0.062 | 0.066 |
|           |     | 25   | 0.057  | 0.057  | 0.056  | 0.054  | 0.061 | 0.062 | 0.057 | 0.070 |
|           | PCA | 2    | 0.128  | 0.128  | 0.051  | 0.645  | 0.057 | 0.056 | 0.057 | 0.134 |
|           |     | 10   | 0.054  | 0.055  | 0.053  | 0.520  | 0.061 | 0.060 | 0.058 | 0.105 |
|           |     | 25   | 0.066  | 0.065  | 0.059  | 0.211  | 0.059 | 0.059 | 0.057 | 0.104 |
| $\lambda$ | SDR | 0    | 17.813 | 17.813 | 17.813 | 17.813 | 1.573 | 1.573 | 1.573 | 1.573 |
|           |     | 2    | 1.748  | 1.748  | 1.710  | 3.023  | 1.099 | 1.094 | 1.081 | 1.339 |
|           |     | 10   | 0.990  | 1.010  | 1.116  | 1.006  | 1.059 | 1.059 | 1.087 | 1.140 |
|           |     | 25   | 1.035  | 1.036  | 1.021  | 1.006  | 1.069 | 1.094 | 1.061 | 1.167 |
|           | PCA | 2    | 1.580  | 1.582  | 0.994  | 18.142 | 1.070 | 1.070 | 1.059 | 1.789 |
|           |     | 10   | 1.058  | 1.066  | 1.041  | 9.348  | 1.087 | 1.081 | 1.078 | 1.499 |
|           |     | 25   | 1.083  | 1.097  | 1.048  | 2.389  | 1.059 | 1.070 | 1.039 | 1.487 |

Table 18: Results of association testing on RVs with window size 10 in the presence of a local non-genetic risk region R1.

|           |     |      |      | w/o pruning |       |       |       | with pruning |       |       |       |
|-----------|-----|------|------|-------------|-------|-------|-------|--------------|-------|-------|-------|
|           |     | #PCs | Test | all         | CVs   | LFVs  | RVs   | all          | CVs   | LFVs  | RVs   |
| Type I    | SDR | 0    | T1   | 0.190       | 0.190 | 0.191 | 0.190 | 0.190        | 0.190 | 0.190 | 0.190 |
|           |     |      | Fp   | 0.171       | 0.171 | 0.172 | 0.171 | 0.171        | 0.171 | 0.171 | 0.171 |
|           |     | 2    | T1   | 0.134       | 0.135 | 0.140 | 0.156 | 0.140        | 0.136 | 0.140 | 0.135 |
|           |     |      | Fp   | 0.130       | 0.130 | 0.136 | 0.153 | 0.135        | 0.131 | 0.136 | 0.131 |
|           |     | 10   | T1   | 0.074       | 0.074 | 0.080 | 0.073 | 0.141        | 0.094 | 0.075 | 0.077 |
|           |     |      | Fp   | 0.072       | 0.075 | 0.082 | 0.071 | 0.139        | 0.091 | 0.076 | 0.076 |
|           |     | 25   | T1   | 0.080       | 0.080 | 0.084 | 0.079 | 0.081        | 0.080 | 0.076 | 0.082 |
|           |     |      | Fp   | 0.076       | 0.076 | 0.081 | 0.078 | 0.078        | 0.078 | 0.076 | 0.080 |
|           | PCA | 2    | T1   | 0.144       | 0.143 | 0.095 | 0.202 | 0.153        | 0.092 | 0.090 | 0.203 |
|           |     |      | Fp   | 0.157       | 0.154 | 0.107 | 0.205 | 0.168        | 0.094 | 0.103 | 0.207 |
|           |     | 10   | T1   | 0.099       | 0.092 | 0.102 | 0.156 | 0.085        | 0.098 | 0.086 | 0.114 |
|           |     |      | Fp   | 0.099       | 0.094 | 0.102 | 0.147 | 0.084        | 0.097 | 0.083 | 0.115 |
|           |     | 25   | T1   | 0.083       | 0.084 | 0.092 | 0.119 | 0.092        | 0.084 | 0.080 | 0.088 |
|           |     |      | Fp   | 0.083       | 0.083 | 0.093 | 0.117 | 0.090        | 0.083 | 0.081 | 0.085 |
| $\lambda$ | SDR | 0    | T1   | 2.100       | 2.100 | 2.110 | 2.100 | 2.100        | 2.100 | 2.100 | 2.100 |
|           |     |      | Fp   | 1.928       | 1.928 | 1.941 | 1.928 | 1.928        | 1.928 | 1.928 | 1.928 |
|           |     | 2    | T1   | 1.745       | 1.747 | 1.767 | 1.978 | 1.768        | 1.729 | 1.756 | 1.725 |
|           |     |      | Fp   | 1.682       | 1.676 | 1.744 | 1.896 | 1.742        | 1.709 | 1.726 | 1.715 |
|           |     | 10   | T1   | 1.153       | 1.170 | 1.236 | 1.152 | 1.767        | 1.298 | 1.178 | 1.180 |
|           |     |      | Fp   | 1.141       | 1.173 | 1.229 | 1.143 | 1.735        | 1.310 | 1.168 | 1.176 |
|           |     | 25   | T1   | 1.222       | 1.204 | 1.204 | 1.220 | 1.205        | 1.211 | 1.207 | 1.203 |
|           |     |      | Fp   | 1.230       | 1.205 | 1.191 | 1.210 | 1.209        | 1.219 | 1.186 | 1.212 |
|           | PCA | 2    | T1   | 1.822       | 1.781 | 1.300 | 2.291 | 1.898        | 1.377 | 1.291 | 2.263 |
|           |     |      | Fp   | 1.781       | 1.754 | 1.312 | 2.110 | 1.906        | 1.311 | 1.281 | 2.133 |
|           |     | 10   | T1   | 1.376       | 1.320 | 1.376 | 1.868 | 1.303        | 1.457 | 1.277 | 1.522 |
|           |     |      | Fp   | 1.350       | 1.296 | 1.354 | 1.751 | 1.288        | 1.459 | 1.265 | 1.514 |
|           |     | 25   | T1   | 1.193       | 1.224 | 1.200 | 1.646 | 1.339        | 1.264 | 1.208 | 1.289 |
|           |     |      | Fp   | 1.183       | 1.212 | 1.218 | 1.655 | 1.362        | 1.238 | 1.181 | 1.291 |

Table 19: Results of association testing on RVs with window size 10 in the presence of a local non-genetic risk region R2.

|           |     |      |      | w/o pruning |       |       |       | with pruning |       |       |       |
|-----------|-----|------|------|-------------|-------|-------|-------|--------------|-------|-------|-------|
|           |     | #PCs | Test | all         | CVs   | LFVs  | RVs   | all          | CVs   | LFVs  | RVs   |
| Type I    | SDR | 0    | T1   | 0.109       | 0.109 | 0.109 | 0.109 | 0.109        | 0.109 | 0.109 | 0.109 |
|           |     |      | Fp   | 0.109       | 0.109 | 0.109 | 0.109 | 0.109        | 0.109 | 0.109 | 0.109 |
|           |     | 2    | T1   | 0.094       | 0.095 | 0.095 | 0.087 | 0.093        | 0.093 | 0.094 | 0.089 |
|           |     |      | Fp   | 0.095       | 0.096 | 0.096 | 0.088 | 0.096        | 0.095 | 0.095 | 0.090 |
|           |     | 10   | T1   | 0.097       | 0.097 | 0.096 | 0.089 | 0.099        | 0.097 | 0.099 | 0.088 |
|           |     |      | Fp   | 0.096       | 0.098 | 0.096 | 0.091 | 0.099        | 0.097 | 0.100 | 0.089 |
|           |     | 25   | T1   | 0.092       | 0.096 | 0.097 | 0.069 | 0.095        | 0.095 | 0.095 | 0.073 |
|           |     |      | Fp   | 0.092       | 0.097 | 0.099 | 0.070 | 0.095        | 0.096 | 0.095 | 0.073 |
|           | PCA | 2    | T1   | 0.101       | 0.100 | 0.100 | 0.120 | 0.100        | 0.095 | 0.100 | 0.123 |
|           |     |      | Fp   | 0.105       | 0.104 | 0.102 | 0.121 | 0.102        | 0.097 | 0.104 | 0.124 |
|           |     | 10   | T1   | 0.108       | 0.107 | 0.109 | 0.120 | 0.106        | 0.100 | 0.097 | 0.117 |
|           |     |      | Fp   | 0.109       | 0.109 | 0.111 | 0.122 | 0.109        | 0.101 | 0.098 | 0.115 |
|           |     | 25   | T1   | 0.091       | 0.093 | 0.096 | 0.125 | 0.085        | 0.097 | 0.090 | 0.096 |
|           |     |      | Fp   | 0.093       | 0.095 | 0.099 | 0.125 | 0.086        | 0.100 | 0.095 | 0.097 |
| $\lambda$ | SDR | 0    | T1   | 1.334       | 1.334 | 1.334 | 1.334 | 1.334        | 1.334 | 1.334 | 1.334 |
|           |     |      | Fp   | 1.360       | 1.360 | 1.360 | 1.360 | 1.360        | 1.360 | 1.360 | 1.360 |
|           |     | 2    | T1   | 1.395       | 1.408 | 1.385 | 1.299 | 1.394        | 1.388 | 1.381 | 1.373 |
|           |     |      | Fp   | 1.418       | 1.424 | 1.385 | 1.320 | 1.404        | 1.407 | 1.406 | 1.395 |
|           |     | 10   | T1   | 1.361       | 1.337 | 1.329 | 1.294 | 1.328        | 1.329 | 1.354 | 1.275 |
|           |     |      | Fp   | 1.355       | 1.362 | 1.339 | 1.302 | 1.323        | 1.345 | 1.352 | 1.289 |
|           |     | 25   | T1   | 1.360       | 1.420 | 1.410 | 1.216 | 1.407        | 1.389 | 1.384 | 1.204 |
|           |     |      | Fp   | 1.364       | 1.431 | 1.453 | 1.197 | 1.414        | 1.446 | 1.439 | 1.186 |
|           | PCA | 2    | T1   | 1.359       | 1.362 | 1.359 | 1.414 | 1.354        | 1.354 | 1.346 | 1.424 |
|           |     |      | Fp   | 1.370       | 1.375 | 1.371 | 1.437 | 1.378        | 1.368 | 1.374 | 1.444 |
|           |     | 10   | T1   | 1.387       | 1.378 | 1.399 | 1.434 | 1.374        | 1.328 | 1.320 | 1.416 |
|           |     |      | Fp   | 1.390       | 1.388 | 1.406 | 1.406 | 1.378        | 1.345 | 1.341 | 1.427 |
|           |     | 25   | T1   | 1.397       | 1.432 | 1.409 | 1.529 | 1.261        | 1.446 | 1.398 | 1.313 |
|           |     |      | Fp   | 1.425       | 1.451 | 1.421 | 1.557 | 1.306        | 1.444 | 1.393 | 1.315 |

Table 20: Association testing results on RVs with window size=20 in R1.

|           |     |      |       | w/o pruning |       |       |       | with pruning |       |       |       |
|-----------|-----|------|-------|-------------|-------|-------|-------|--------------|-------|-------|-------|
|           |     | #PCs | Tests | all         | CVs   | LFVs  | RVs   | all          | CVs   | LFVs  | RVs   |
| Type I    | SDR | 0    | T1    | 0.201       | 0.201 | 0.201 | 0.201 | 0.201        | 0.201 | 0.201 | 0.201 |
|           |     |      | Fp    | 0.184       | 0.184 | 0.184 | 0.184 | 0.184        | 0.184 | 0.184 | 0.184 |
|           |     | 2    | T1    | 0.136       | 0.134 | 0.147 | 0.176 | 0.148        | 0.141 | 0.147 | 0.141 |
|           |     |      | Fp    | 0.133       | 0.131 | 0.145 | 0.173 | 0.145        | 0.136 | 0.145 | 0.136 |
|           |     | 10   | T1    | 0.077       | 0.078 | 0.089 | 0.075 | 0.147        | 0.093 | 0.081 | 0.083 |
|           |     |      | Fp    | 0.075       | 0.076 | 0.087 | 0.074 | 0.143        | 0.092 | 0.079 | 0.081 |
|           |     | 25   | T1    | 0.082       | 0.084 | 0.084 | 0.080 | 0.080        | 0.077 | 0.079 | 0.084 |
|           |     |      | Fp    | 0.079       | 0.080 | 0.082 | 0.078 | 0.077        | 0.077 | 0.079 | 0.083 |
|           | PCA | 2    | T1    | 0.159       | 0.155 | 0.107 | 0.229 | 0.175        | 0.093 | 0.084 | 0.248 |
|           |     |      | Fp    | 0.158       | 0.153 | 0.108 | 0.211 | 0.173        | 0.090 | 0.083 | 0.229 |
|           |     | 10   | T1    | 0.115       | 0.104 | 0.123 | 0.159 | 0.095        | 0.119 | 0.093 | 0.145 |
|           |     |      | Fp    | 0.116       | 0.105 | 0.123 | 0.149 | 0.096        | 0.120 | 0.095 | 0.147 |
|           |     | 25   | T1    | 0.081       | 0.086 | 0.096 | 0.127 | 0.098        | 0.088 | 0.084 | 0.092 |
|           |     |      | Fp    | 0.079       | 0.084 | 0.094 | 0.123 | 0.096        | 0.086 | 0.082 | 0.091 |
| $\lambda$ | SDR | 0    | T1    | 2.324       | 2.324 | 2.324 | 2.324 | 2.324        | 2.324 | 2.324 | 2.324 |
|           |     |      | Fp    | 2.078       | 2.078 | 2.078 | 2.078 | 2.078        | 2.078 | 2.078 | 2.078 |
|           |     | 2    | T1    | 1.798       | 1.752 | 1.912 | 2.170 | 1.919        | 1.840 | 1.921 | 1.815 |
|           |     |      | Fp    | 1.764       | 1.748 | 1.861 | 2.125 | 1.888        | 1.821 | 1.877 | 1.759 |
|           |     | 10   | T1    | 1.201       | 1.209 | 1.293 | 1.197 | 1.879        | 1.401 | 1.244 | 1.246 |
|           |     |      | Fp    | 1.193       | 1.203 | 1.260 | 1.199 | 1.838        | 1.385 | 1.235 | 1.228 |
|           |     | 25   | T1    | 1.312       | 1.309 | 1.341 | 1.268 | 1.269        | 1.250 | 1.259 | 1.274 |
|           |     |      | Fp    | 1.284       | 1.289 | 1.305 | 1.278 | 1.295        | 1.289 | 1.250 | 1.263 |
|           | PCA | 2    | T1    | 2.027       | 2.000 | 1.447 | 2.575 | 2.253        | 1.359 | 1.279 | 2.798 |
|           |     |      | Fp    | 1.987       | 1.945 | 1.452 | 2.343 | 2.232        | 1.318 | 1.277 | 2.599 |
|           |     | 10   | T1    | 1.522       | 1.435 | 1.608 | 1.908 | 1.383        | 1.607 | 1.347 | 1.824 |
|           |     |      | Fp    | 1.560       | 1.449 | 1.640 | 1.790 | 1.403        | 1.627 | 1.365 | 1.848 |
|           |     | 25   | T1    | 1.320       | 1.338 | 1.349 | 1.697 | 1.457        | 1.366 | 1.279 | 1.383 |
|           |     |      | Fp    | 1.302       | 1.329 | 1.387 | 1.673 | 1.440        | 1.357 | 1.294 | 1.377 |

Table 21: Association testing results on RVs with window size=20 in R2.

|           |     |      |       | w/o pruning |       |       |       | with pruning |       |       |       |
|-----------|-----|------|-------|-------------|-------|-------|-------|--------------|-------|-------|-------|
|           |     | #PCs | Tests | all         | CVs   | LFVs  | RVs   | all          | CVs   | LFVs  | RVs   |
| Type I    | SDR | 0    | T1    | 0.121       | 0.121 | 0.121 | 0.121 | 0.121        | 0.121 | 0.121 | 0.121 |
|           |     |      | Fp    | 0.123       | 0.123 | 0.123 | 0.123 | 0.123        | 0.123 | 0.123 | 0.123 |
|           |     | 2    | T1    | 0.094       | 0.095 | 0.096 | 0.086 | 0.094        | 0.093 | 0.095 | 0.090 |
|           |     |      | Fp    | 0.093       | 0.093 | 0.099 | 0.085 | 0.096        | 0.093 | 0.095 | 0.087 |
|           |     | 10   | T1    | 0.092       | 0.090 | 0.097 | 0.087 | 0.093        | 0.089 | 0.099 | 0.089 |
|           |     |      | Fp    | 0.091       | 0.090 | 0.094 | 0.087 | 0.091        | 0.089 | 0.097 | 0.087 |
|           |     | 25   | T1    | 0.097       | 0.099 | 0.103 | 0.069 | 0.101        | 0.096 | 0.099 | 0.073 |
|           |     |      | Fp    | 0.098       | 0.101 | 0.104 | 0.069 | 0.100        | 0.100 | 0.099 | 0.075 |
|           | PCA | 2    | T1    | 0.111       | 0.110 | 0.111 | 0.153 | 0.110        | 0.100 | 0.111 | 0.157 |
|           |     |      | Fp    | 0.111       | 0.110 | 0.112 | 0.154 | 0.111        | 0.101 | 0.112 | 0.159 |
|           |     | 10   | T1    | 0.119       | 0.117 | 0.121 | 0.148 | 0.111        | 0.098 | 0.096 | 0.137 |
|           |     |      | Fp    | 0.121       | 0.118 | 0.122 | 0.143 | 0.112        | 0.099 | 0.098 | 0.138 |
|           |     | 25   | T1    | 0.095       | 0.096 | 0.106 | 0.161 | 0.090        | 0.100 | 0.096 | 0.110 |
|           |     |      | Fp    | 0.096       | 0.096 | 0.107 | 0.161 | 0.092        | 0.102 | 0.096 | 0.110 |
| $\lambda$ | SDR | 0    | T1    | 1.584       | 1.584 | 1.584 | 1.584 | 1.584        | 1.584 | 1.584 | 1.584 |
|           |     |      | Fp    | 1.584       | 1.584 | 1.584 | 1.584 | 1.584        | 1.584 | 1.584 | 1.584 |
|           |     | 2    | T1    | 1.392       | 1.396 | 1.412 | 1.301 | 1.411        | 1.403 | 1.408 | 1.338 |
|           |     |      | Fp    | 1.376       | 1.385 | 1.410 | 1.290 | 1.393        | 1.367 | 1.402 | 1.325 |
|           |     | 10   | T1    | 1.322       | 1.324 | 1.350 | 1.283 | 1.355        | 1.320 | 1.360 | 1.307 |
|           |     |      | Fp    | 1.358       | 1.337 | 1.337 | 1.291 | 1.364        | 1.331 | 1.373 | 1.305 |
|           |     | 25   | T1    | 1.429       | 1.423 | 1.482 | 1.169 | 1.441        | 1.415 | 1.429 | 1.192 |
|           |     |      | Fp    | 1.422       | 1.437 | 1.487 | 1.176 | 1.444        | 1.435 | 1.453 | 1.163 |
|           | PCA | 2    | T1    | 1.468       | 1.459 | 1.500 | 1.832 | 1.475        | 1.399 | 1.479 | 1.883 |
|           |     |      | Fp    | 1.491       | 1.477 | 1.477 | 1.881 | 1.489        | 1.412 | 1.498 | 1.913 |
|           |     | 10   | T1    | 1.534       | 1.533 | 1.567 | 1.741 | 1.465        | 1.351 | 1.349 | 1.691 |
|           |     |      | Fp    | 1.528       | 1.506 | 1.554 | 1.757 | 1.488        | 1.377 | 1.360 | 1.706 |
|           |     | 25   | T1    | 1.379       | 1.427 | 1.431 | 1.910 | 1.335        | 1.450 | 1.386 | 1.453 |
|           |     |      | Fp    | 1.410       | 1.443 | 1.461 | 1.902 | 1.340        | 1.448 | 1.415 | 1.478 |

Figure 1: PC3 and PC4 of SDR. ASW=0(black), CEU=1(blue), FIN=2(darkgreen), GBR=3(red), LWK=4(darkmagenta), MXL=5(blueviolet), PUR=6(brown), PUR2=7(chocolate), TSI=8(cyan), YRI=9(coral)

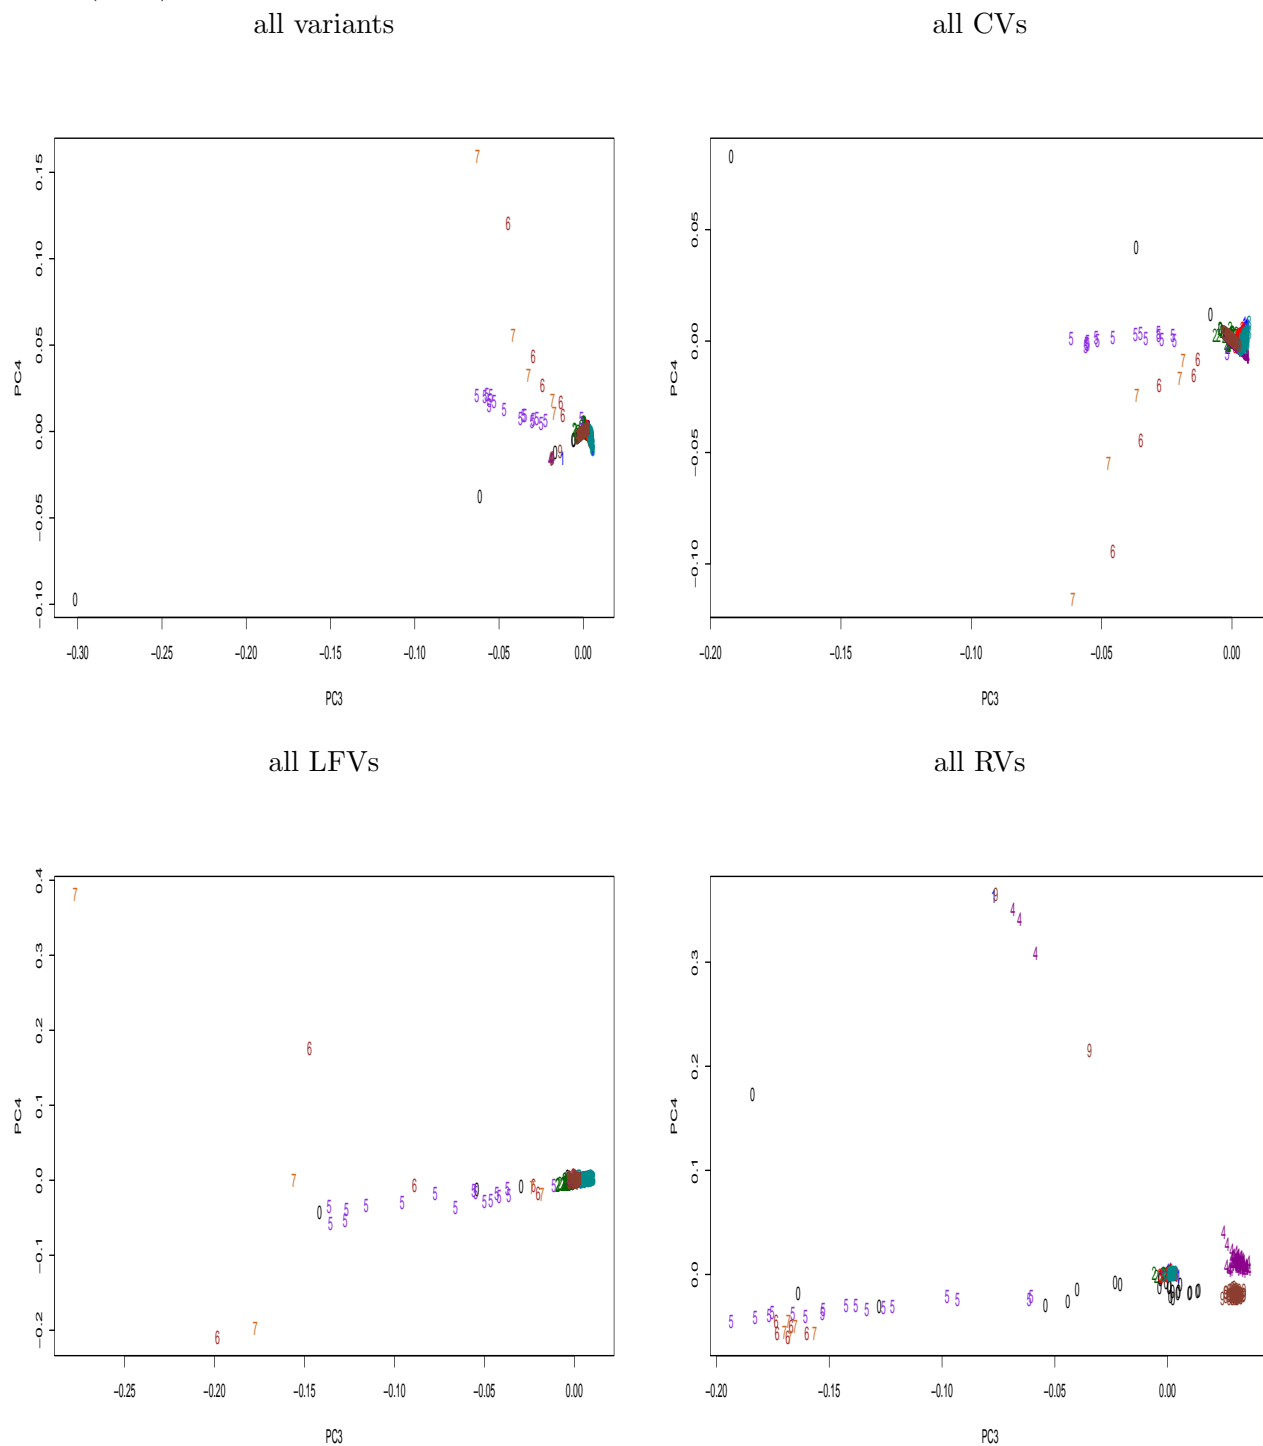

Figure 2: PC3 and PC4 of PCA. ASW=0(black), CEU=1(blue), FIN=2(darkgreen), GBR=3(red), LWK=4(darkmagenta), MXL=5(blueviolet), PUR=6(brown), PUR2=7(chocolate), TSI=8(cyan), YRI=9(coral)

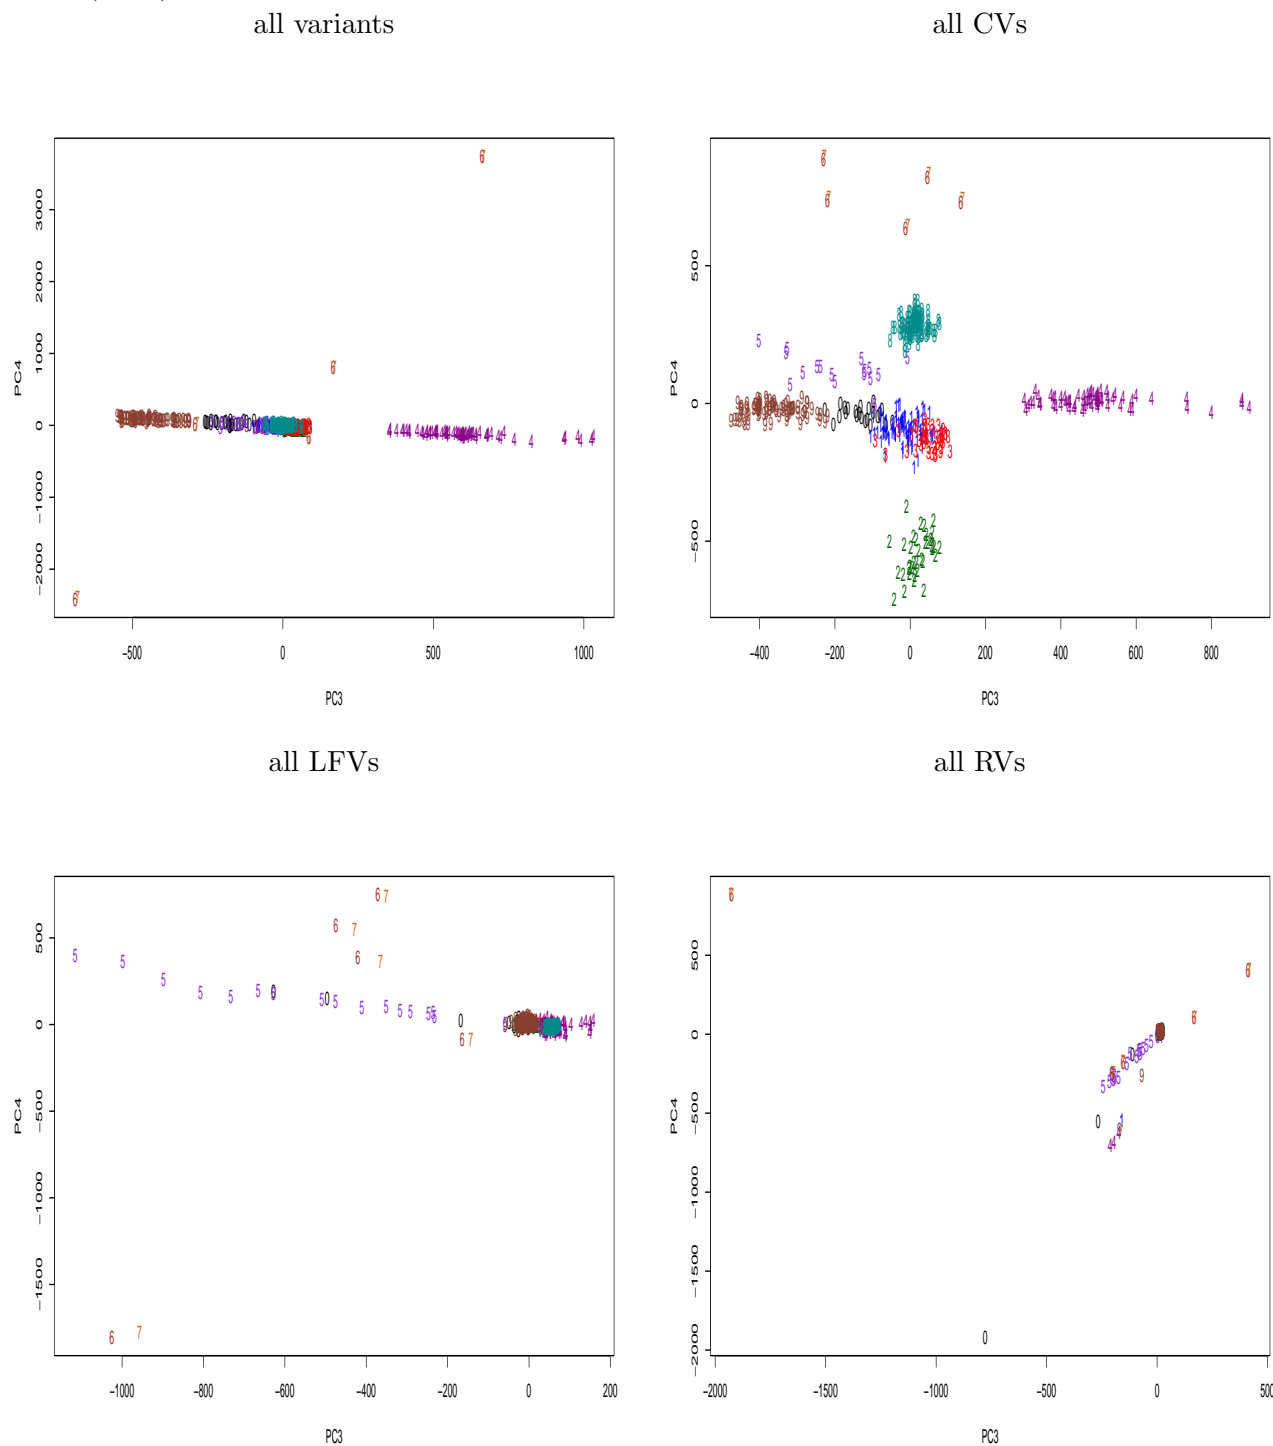

Figure 3: PC1 and PC2 of SDR without AMRs. ASW=0(black), CEU=1(blue), FIN=2(darkgreen), GBR=3(red), LWK=4(darkmagenta), TSI=8(cyan), YRI=9(coral)

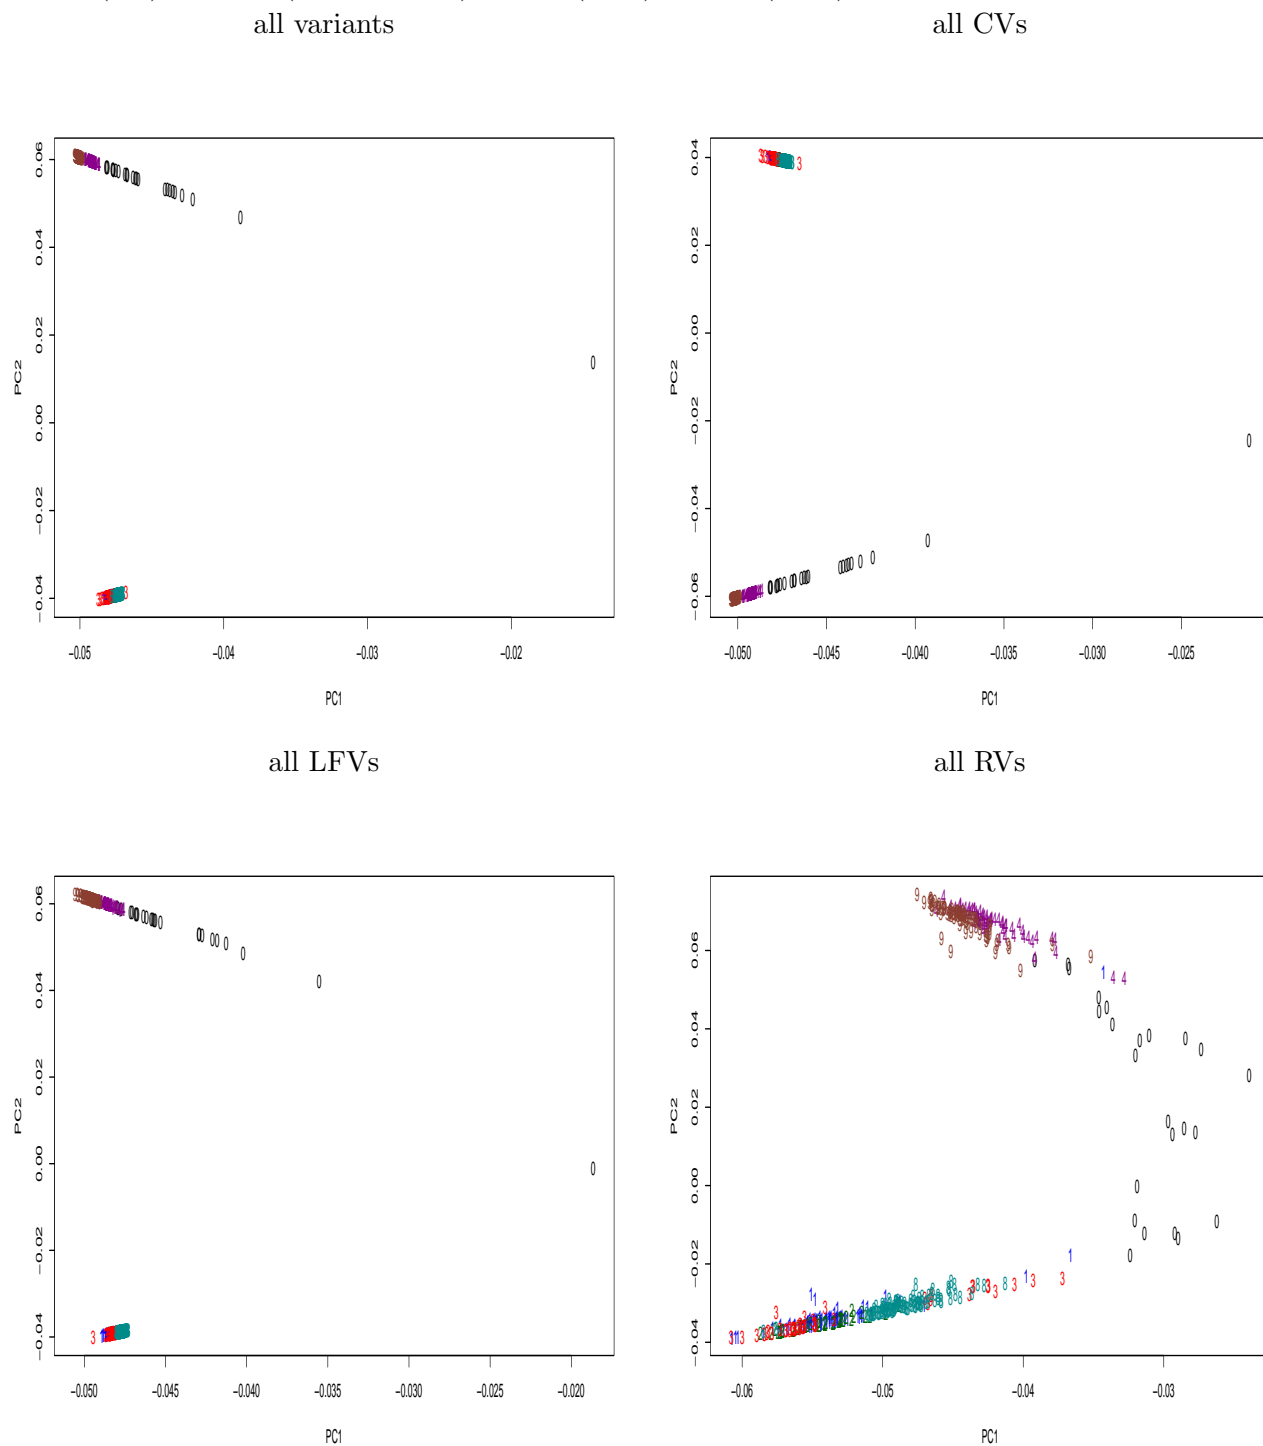

Figure 4: PC1 and PC2 of PCA without AMRs. ASW=0(black), CEU=1(blue), FIN=2(darkgreen), GBR=3(red), LWK=4(darkmagenta), TSI=8(cyan), YRI=9(coral)  
all variants all CVs

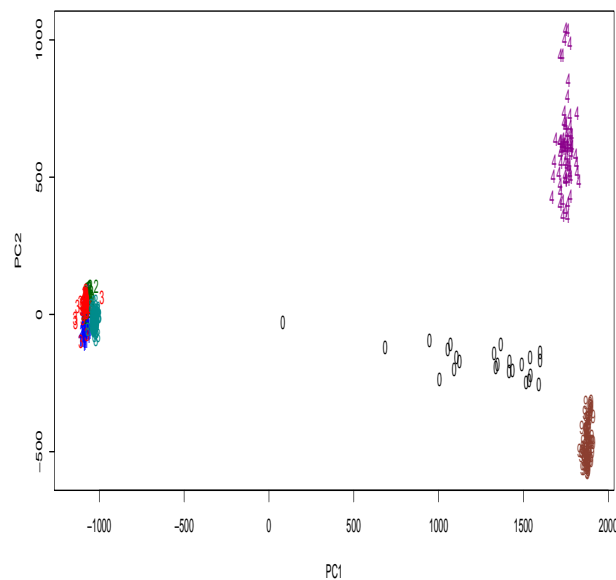

all LFVs

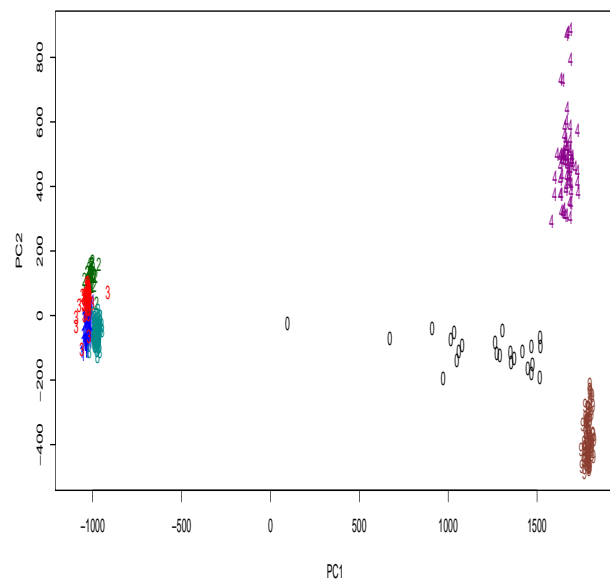

all RVs

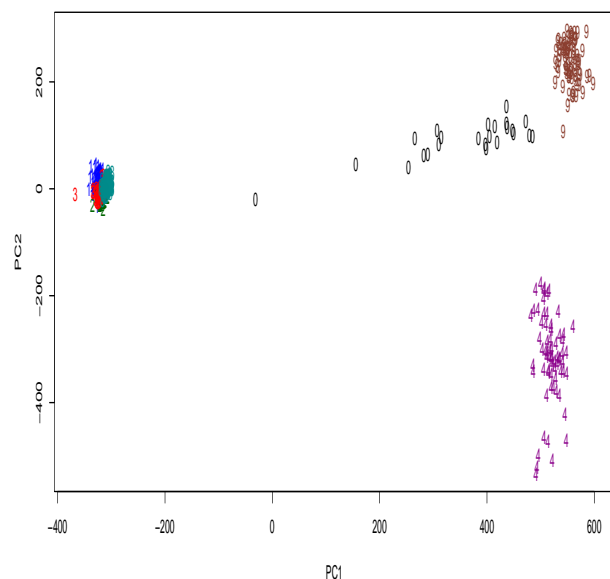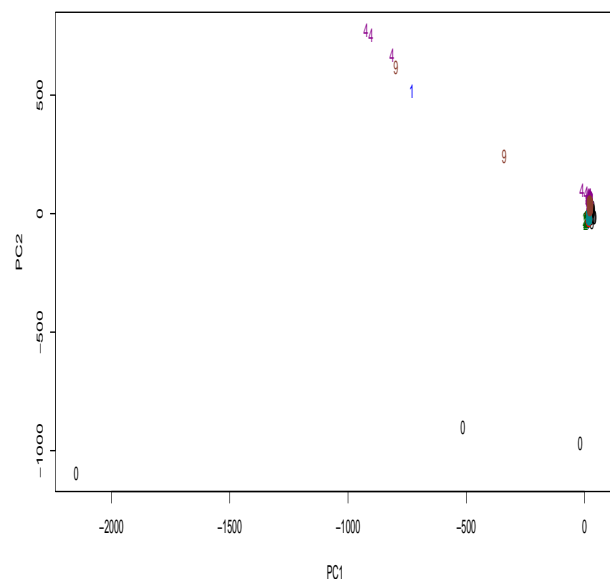

Figure 5: PC1 and PC2 of SDR without AMRs of pruned variants and 10000 pruned variants. ASW=0(black), CEU=1(blue), FIN=2(darkgreen), GBR=3(red), LWK=4(darkmagenta), TSI=8(cyan), YRI=9(coral)

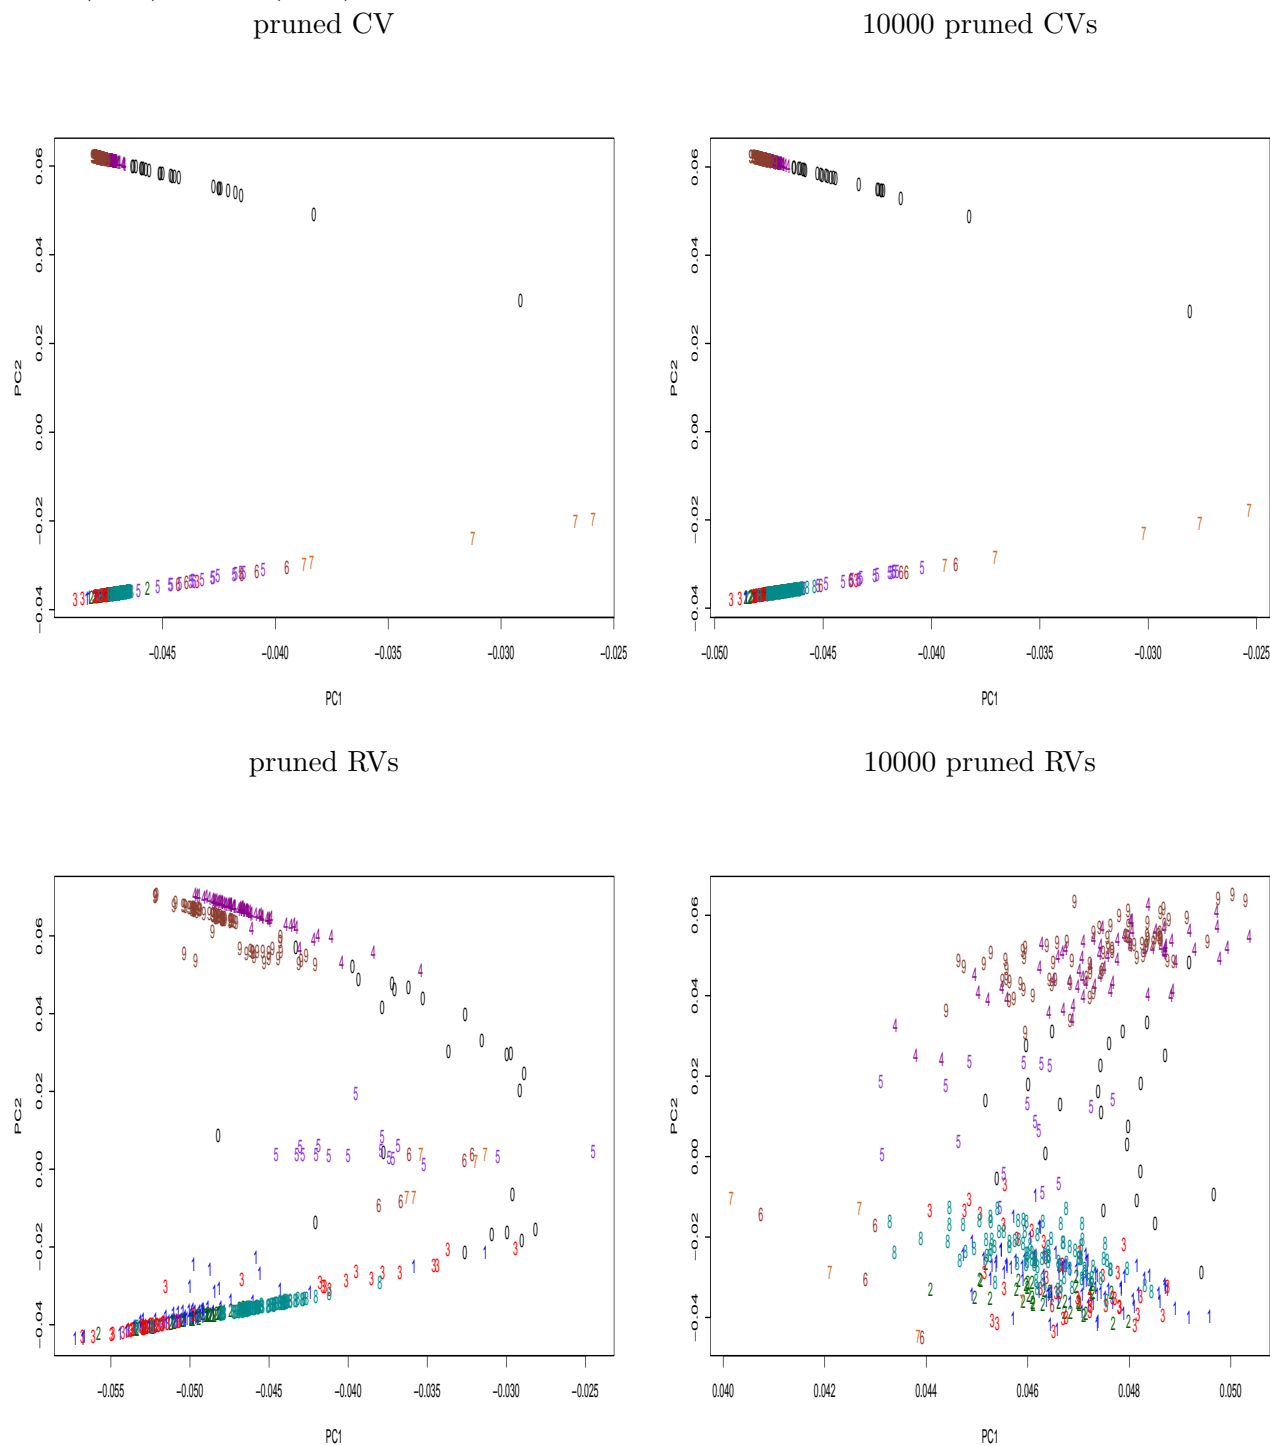

Figure 6: PC1 and PC2 of PCA of all RVs, all pruned RVs and 10000 pruned RVs. ASW=0(black), CEU=1(blue), FIN=2(darkgreen), GBR=3(red), LWK=4(darkmagenta), MXL=5(blueviolet), PUR=6(brown), PUR2=7(chocolate), TSI=8(cyan), YRI=9(coral)

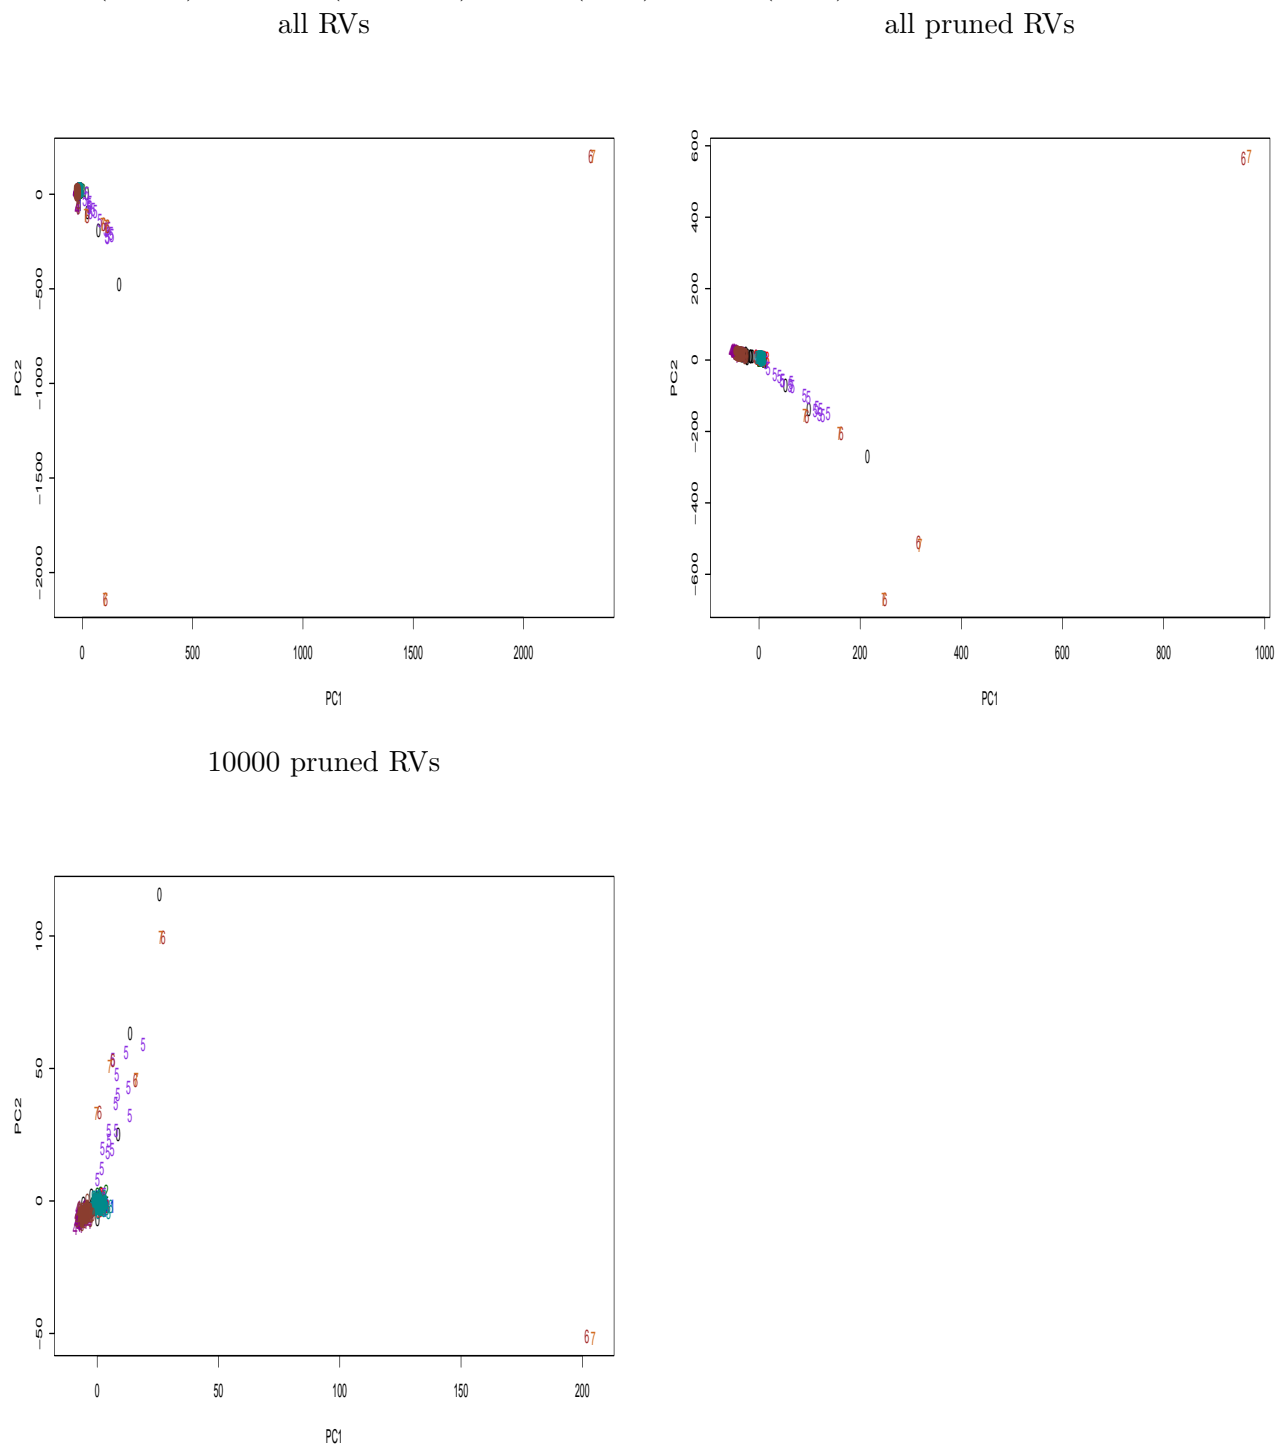

Figure 7: Change of (a)RI with the number of clusters. The black line is for RI and the red line is for aRI.

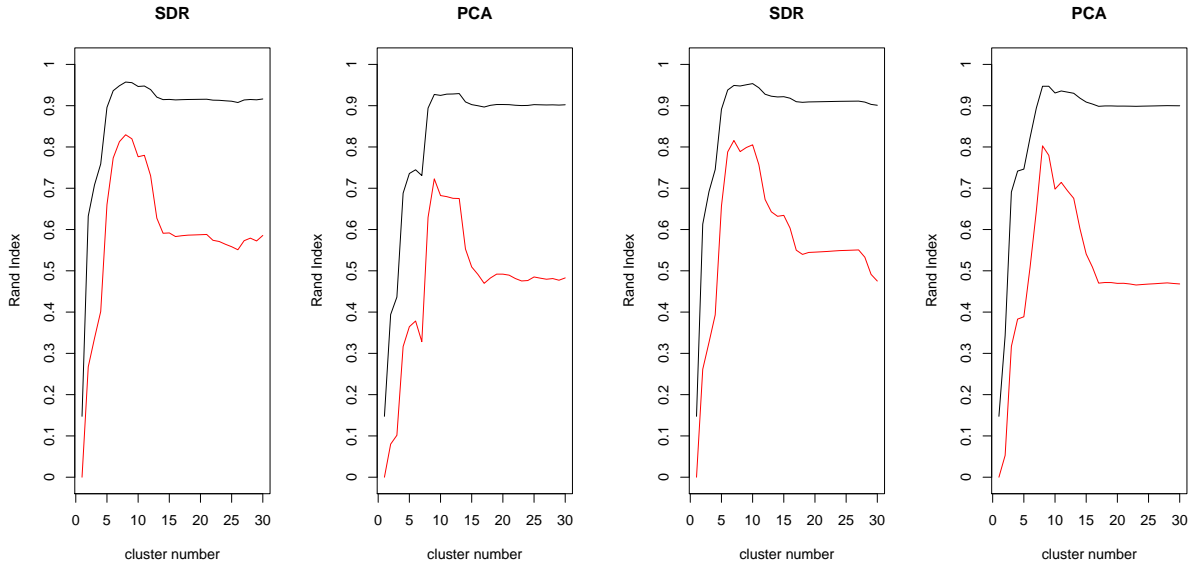

(a) all variants

(b) all CVs

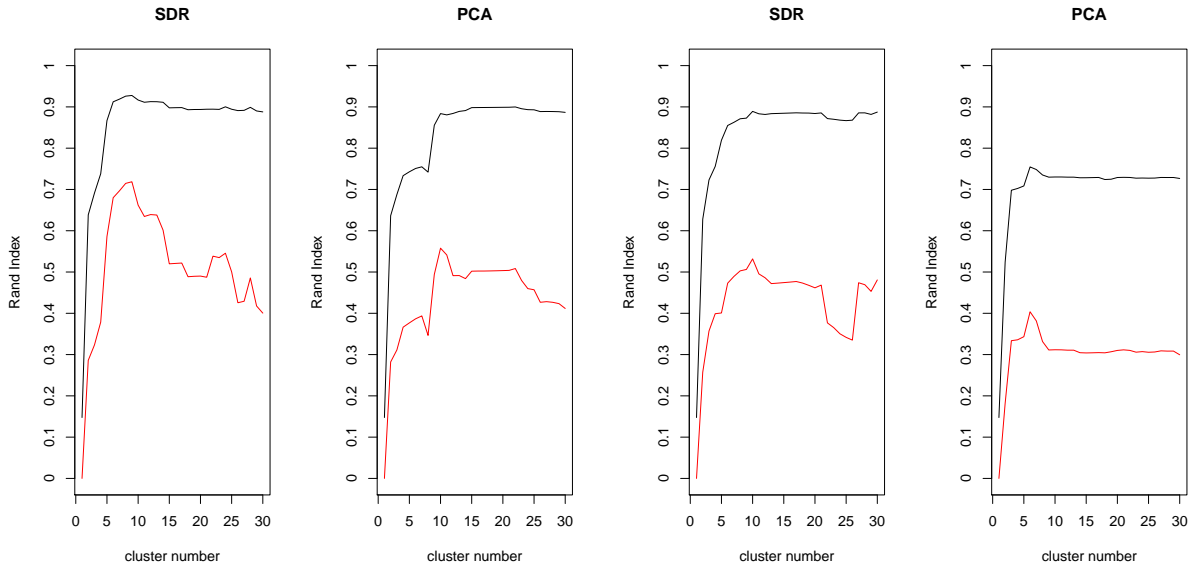

(c) all LFVs

(d) all RVs

Figure 8: Q-Q plots of association testing of CVs with adjustment of PCs of SDR in all 3 simulations.

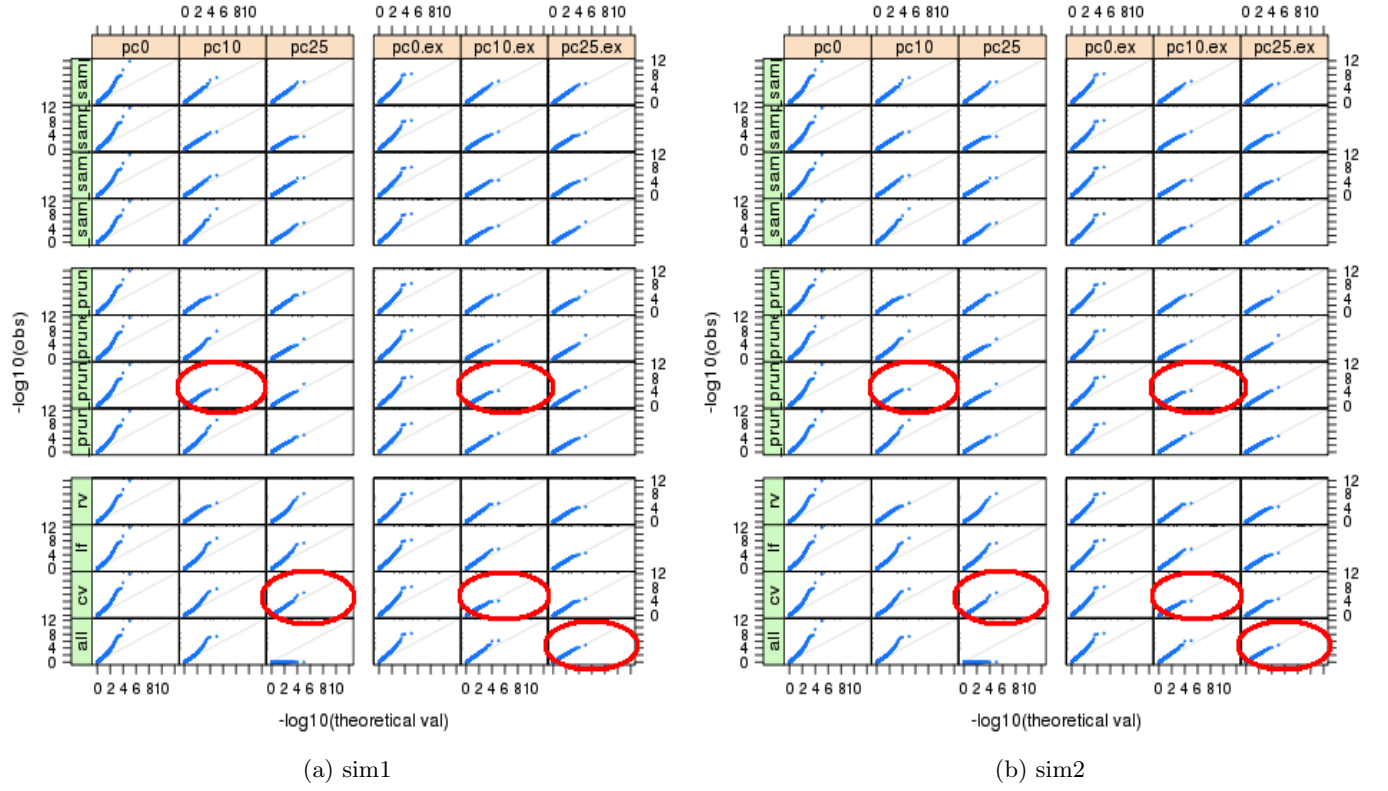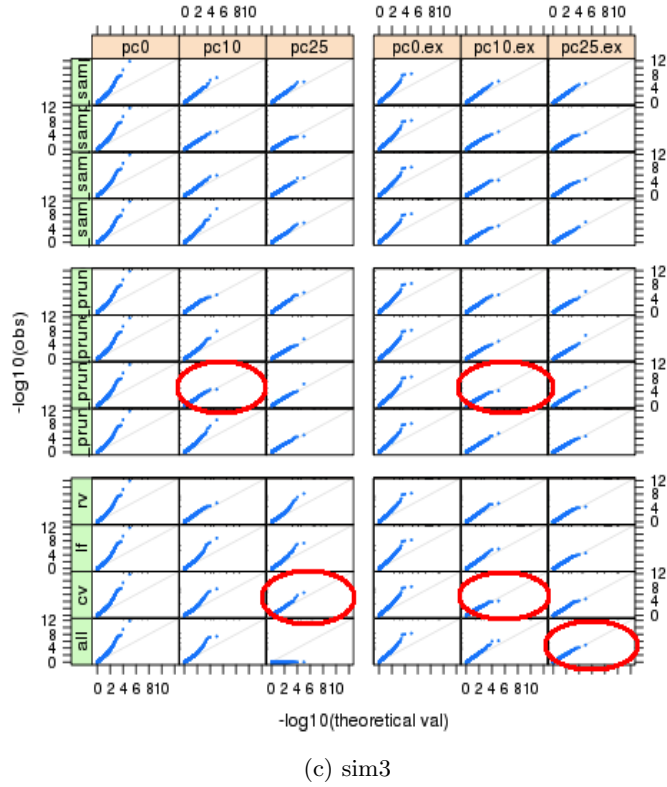

Figure 9: Q-Q plots of association testing of RVs with adjustment of PCs of SDR in all 3 simulations.

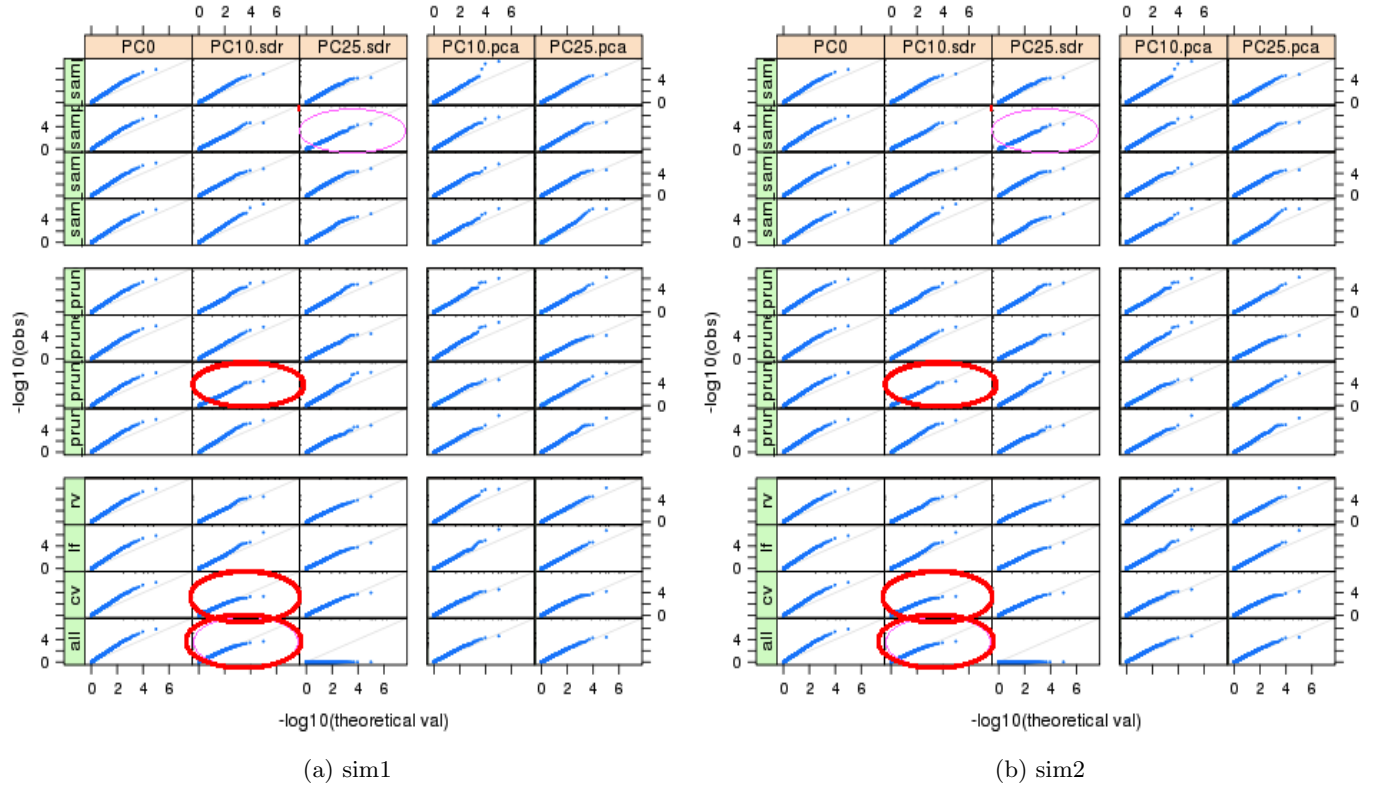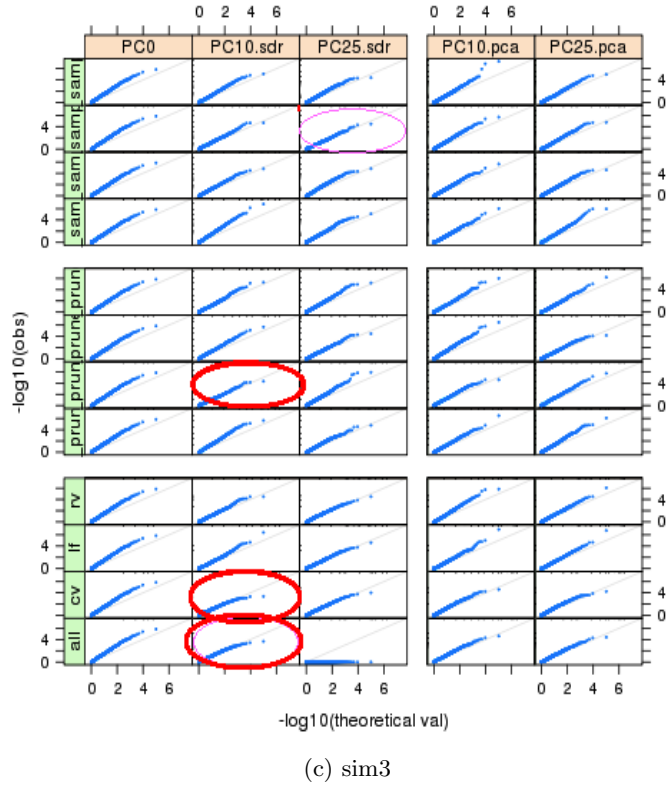

Supplement: NIHMS534718-supplement-Suppl.pdf [file NIHMS534718-supplement-Suppl.pdf]
